# Supplementary material for: Comparative Mitochondrial Genomics of 104 Darwin Wasps (Hymenoptera: Ichneumonidae) and Its Implication for Phylogeny
Source: MDPI journal article supplement (doi:10.3390/insects13020124), 2022-01-25
Supplement: s1 [file s1]

# Supplementary Information

## Comparative mitochondrial genomics of 104 Darwin wasps (Hymenoptera: Ichneumonidae) and its implication for phylogeny

Boying Zheng <sup>1,2</sup> Yuanyuan Han <sup>1,2</sup>, Ruizhong Yuan <sup>1,2</sup>, Jingxian Liu <sup>3</sup>, Cornelis van Achterberg <sup>1,2</sup>, Pu Tang <sup>1,2,4,5,\*</sup> and Xuexin Chen <sup>1,2,4,5</sup>

- <sup>1</sup> State Key Laboratory of Rice Biology, Zhejiang University, Hangzhou 310058, China; zhengboyingg@163.com (B.Z.); yyhan6@zju.edu.cn (Y.H.); monareason@zju.edu.cn (R.Y.); kees@vanachterberg.org (C.A.); xxchen@zju.edu.cn (X.C.)
  - <sup>2</sup> Institute of Insect Sciences, College of Agriculture and Biotechnology, Zhejiang University, Hangzhou 310058, China
  - <sup>3</sup> Department of Entomology, College of Plant Protection, South China Agricultural University, Guangzhou 510642, China; jingxianliu@foxmail.com
  - <sup>4</sup> Ministry of Agriculture Key Lab of Molecular Biology of Crop Pathogens and Insects, Zhejiang University, Hangzhou 310058, China
  - <sup>5</sup> Zhejiang Provincial Key Laboratory of Biology of Crop Pathogens and Insects, Zhejiang University, Hangzhou 310058, China
- \* Correspondence: ptang@zju.edu.cn

## Supplementary Contents

|                                                                                                                                                                                                                                                                         |           |
|-------------------------------------------------------------------------------------------------------------------------------------------------------------------------------------------------------------------------------------------------------------------------|-----------|
| <b>Supplementary Tables (S1- S3).....</b>                                                                                                                                                                                                                               | <b>4</b>  |
| <b>Table S1</b> Information for the mitochondrial genomes used for phylogenetic inference.....                                                                                                                                                                          | 4         |
| <b>Table S2</b> Information for the mitochondrial genomes exclude Ichneumonidae used for comparative analysis.....                                                                                                                                                      | 7         |
| <b>Table S3</b> Partitions and their best model list.....                                                                                                                                                                                                               | 9         |
| <b>Supplementary Figures (S1- S11) .....</b>                                                                                                                                                                                                                            | <b>11</b> |
| <b>Figure S1</b> The mitochondrial genes arrangement pattern of Ichneumonidae. Ther are 38 types of the rearrangement pattern (R1-R38). .....                                                                                                                           | 12        |
| <b>Figure S2</b> Base composition of the majority strand and the protein-coding genes (PCGs) of mitochondrial genomes for Ichneumonidae, Braconidae and other parasitoid Hymenoptera. ....                                                                              | 13        |
| <b>Figure S3</b> The base substitutional saturation plots of 1st, 2nd and 3rd sites for 13 protein-coding genes (PCGs).....                                                                                                                                             | 15        |
| <b>Figure S4</b> Heterogeneity analysis for AA and NU matrixes.....                                                                                                                                                                                                     | 17        |
| <b>Figure S5</b> Ordination of 104 ichneumonid sequences on the two principal correspondence analysis axes. .                                                                                                                                                           | 18        |
| <b>Figure S6</b> Phylogenetic relationships of Ichneumonid wasps inferred from amino acid sequences of 13 protein-coding genes in mitochondrial genomes (AA matrix) by ML method. ....                                                                                  | 19        |
| <b>Figure S7</b> Phylogenetic relationships of Ichneumonid wasps inferred from nucleotide sequences of 13 protein-coding genes in mitochondrial genomes (NU matrix) by BI inference. ....                                                                               | 21        |
| <b>Figure S8</b> Phylogenetic relationships of Ichneumonid wasps inferred from nucleotide sequences of 13 protein-coding genes in mitochondrial genomes (NU matrix) by ML method. ....                                                                                  | 22        |
| <b>Figure S9</b> Results from likelihood mapping. The analysis was based on both AA and NU matrixes.....                                                                                                                                                                | 26        |
| <b>Fig. S10</b> The mean for relative synonymous codon usage (RSCU) of 13 protein-coding genes in mitochondrial genomes of Ichneumonidae and Braconidae. ....                                                                                                           | 26        |
| <b>Figure S11</b> The Correlation test for the factors that influence RSCU bias against the first major axis (Axis1/48.93% explanation of the variation) generated by Correspondence Analysis (COA) in Ichneumonidae, Braconidae and other parasitoid Hymenoptera. .... | 27        |
| <b>Supplementary Reference.....</b>                                                                                                                                                                                                                                     | <b>28</b> |

## **Supplementary Data**

**Supplementary Data S1** The general features of mitochondrial genomes of Ichneumonidae

**Supplementary Data S2** Aligned Sequences files

## Supplementary Tables (S1- S3)

**Table S1** Information for the mitochondrial genomes used for phylogenetic inference.

| Voucher<br>Specimens | Fammily       | Subfamily       | Species                        | Collection Place | Accession<br>Number | Reference   |
|----------------------|---------------|-----------------|--------------------------------|------------------|---------------------|-------------|
| ZJUHW_202000001      | Ichneumonidae | Rhyssinae       | <i>Megarhyssa jezoensis</i>    | Beijing, China   | MT252834            | This study  |
| ZJUHW_202000002      | Ichneumonidae | Rhyssinae       | <i>Triancyra</i> sp.           | Tibet, China     | MT252835            | This study  |
| ZJUHW_202000003      | Ichneumonidae | Anomaloninae    | <i>Heteropelma</i> sp.         | Qinghai, China   | MT252836            | This study  |
| ZJUHW_202000004      | Ichneumonidae | Anomaloninae    | <i>Anomalon</i> sp.            | Yunnan, China    | MT252837            | This study  |
| ZJUHW_202000005      | Ichneumonidae | Ctenopelmatinae | <i>Lagarotis</i> sp.           | Hainan, China    | MT252838            | This study  |
| ZJUHW_202000006      | Ichneumonidae | Ctenopelmatinae | <i>Phobetres</i> sp.1          | Liaoning, China  | MT252839            | This study  |
| ZJUHW_202000007      | Ichneumonidae | Ctenopelmatinae | <i>Phobetres</i> sp.2          | Zhejiang, China  | MT252840            | This study  |
| ZJUHW_202000008      | Ichneumonidae | Ctenopelmatinae | <i>Opheltes</i> sp.            | Guizhou, China   | MT252841            | This study  |
| ZJUHW_202000009      | Ichneumonidae | Ctenopelmatinae | <i>Pion</i> sp.                | Guizhou, China   | MT252842            | This study  |
| ZJUHW_202000010      | Ichneumonidae | Ctenopelmatinae | <i>Scolobates</i> sp.          | Hainan, China    | MT252843            | This study  |
| ZJUHW_202000011      | Ichneumonidae | Ctenopelmatinae | <i>Alexeter nebulator</i>      | Henan, China     | MT252844            | This study  |
| ZJUHW_202000012      | Ichneumonidae | Banchinae       | <i>Glyptopimpla</i> sp.        | Tibet, China     | MT252845            | This study  |
| ZJUHW_202000013      | Ichneumonidae | Banchinae       | <i>Orientoglypta</i> sp.1      | Liaoning, China  | MT252846            | This study  |
| ZJUHW_202000014      | Ichneumonidae | Banchinae       | <i>Orientoglypta</i> sp.2      | Liaoning, China  | MT252847            | This study  |
| ZJUHW_202000015      | Ichneumonidae | Banchinae       | <i>Lissonota</i> sp.           | Zhejiang, China  | MT252848            | This study  |
| ZJUHW_202000016      | Ichneumonidae | Banchinae       | <i>Glypta wahl</i>             | Zhejiang, China  | MT252849            | This study  |
| ZJUHW_202000017      | Ichneumonidae | Xoridinae       | <i>Odontocolon</i> sp.         | Liaoning, China  | MT252850            | unpublished |
| ZJUHW_202000018      | Ichneumonidae | Xoridinae       | <i>Xorides funiuensis</i>      | Sichuan, China   | MT252851            | unpublished |
| ZJUHW_202000019      | Ichneumonidae | Eucerotinae     | <i>Euceros kiushuensis</i>     | Tibet, China     | MT252852            | unpublished |
| ZJUHW_202000020      | Ichneumonidae | Eucerotinae     | <i>Euceros serricornis</i>     | Sichuan, China   | MT252853            | unpublished |
| ZJUHW_202000021      | Ichneumonidae | Diplazontinae   | <i>Promethes</i> sp.           | Sichuan, China   | MT252854            | This study  |
| ZJUHW_202000022      | Ichneumonidae | Diplazontinae   | <i>Syrphoctonus</i> sp.        | Yunnan, China    | MT252855            | This study  |
| ZJUHW_202000023      | Ichneumonidae | Diplazontinae   | <i>Sussaba sugiharai</i>       | Yunnan, China    | MT252856            | This study  |
| ZJUHW_202000024      | Ichneumonidae | Diplazontinae   | <i>Diplazon laetatorius</i>    | Yunnan, China    | MT252857            | This study  |
| ZJUHW_202000026      | Ichneumonidae | Microleptinae   | <i>Microleptes</i> sp.         | Liaoning, China  | MT252859            | This study  |
| ZJUHW_202000028      | Ichneumonidae | Diacritinae     | <i>Diacritus aciculatus</i>    | Liaoning, China  | MT252861            | This study  |
| ZJUHW_202000029      | Ichneumonidae | Cylloceriinae   | <i>Hyperacmus crassicornis</i> | Yunnan, China    | MT252862            | This study  |
| ZJUHW_202000030      | Ichneumonidae | Cylloceriinae   | <i>Cylloceria</i> sp.          | Liaoning, China  | MT252863            | This study  |
| ZJUHW_202000031      | Ichneumonidae | Ophioninae      | <i>Ophion</i> sp.              | Liaoning, China  | MT252864            | This study  |
| ZJUHW_202000032      | Ichneumonidae | Ophioninae      | <i>Enicospilus</i> sp.2        | Tibet, China     | MT252865            | This study  |
| ZJUHW_202000033      | Ichneumonidae | Agriotypinae    | <i>Agriotypus</i> sp.          | Zhejiang, China  | MT252866            | This study  |
| ZJUHW_202000034      | Ichneumonidae | Hybrizontinae   | <i>Hybrizon hei</i>            | Shandong, China  | MT252867            | This study  |
| ZJUHW_202000035      | Ichneumonidae | Hybrizontinae   | <i>Hybrizon xu</i>             | Shandong, China  | MT252868            | This study  |
| ZJUHW_202000036      | Ichneumonidae | Poemeniinae     | <i>Eugalta</i> sp.1            | Sichuan, China   | MT252869            | This study  |
| ZJUHW_202000037      | Ichneumonidae | Poemeniinae     | <i>Cnastis</i> sp.             | Guizhou, China   | MT252870            | This study  |



|                 |               |                 |                                 |                     |          |            |
|-----------------|---------------|-----------------|---------------------------------|---------------------|----------|------------|
| ZJUHW_202000038 | Ichneumonidae | Poemeniinae     | <i>Eugalta</i> sp.2             | Taiwan, China       | MT252871 | This study |
| ZJUHW_202000039 | Ichneumonidae | Cryptinae       | <i>Acroricnus chinensis</i>     | Yunnan, China       | MT302538 | This study |
| ZJUHW_202000040 | Ichneumonidae | Cryptinae       | <i>Gambrus</i> sp.              | Tibet, China        | MT252872 | This study |
| ZJUHW_202000041 | Ichneumonidae | Cryptinae       | <i>Kemalia</i> sp.              | Jiangxi, China      | MT252873 | This study |
| ZJUHW_202000042 | Ichneumonidae | Cryptinae       | <i>Friona</i> sp.               | Jiangxi, China      | MT252874 | This study |
| ZJUHW_202000043 | Ichneumonidae | Cryptinae       | <i>Dagathia</i> sp.             | Liaoning, China     | MT252875 | This study |
| ZJUHW_202000044 | Ichneumonidae | Phygadeuontinae | <i>Colocnema rufina</i>         | Shaanxi, China      | MT252876 | This study |
| ZJUHW_202000045 | Ichneumonidae | Ateleutinae     | <i>Ateleute</i> sp.             | Yunnan, China       | MT252877 | This study |
| ZJUHW_202000046 | Ichneumonidae | Pimplinae       | <i>Pimpla aequalis</i>          | Zhejiang, China     | MT252878 | This study |
| ZJUHW_202000047 | Ichneumonidae | Pimplinae       | <i>Acropimpla</i> sp.           | Zhejiang, China     | MT252879 | This study |
| ZJUHW_202000048 | Ichneumonidae | Pimplinae       | <i>Scambus</i> sp.1             | Yunnan, China       | MT252880 | This study |
| ZJUHW_202000049 | Ichneumonidae | Pimplinae       | <i>Sinarachna pallipes</i>      | Yunnan, China       | MT252881 | This study |
| ZJUHW_202000050 | Ichneumonidae | Pimplinae       | <i>Scambus</i> sp.2             | Yunnan, China       | MT252882 | This study |
| ZJUHW_202000051 | Ichneumonidae | Pimplinae       | <i>Dolichomitus irritator</i>   | Yunnan, China       | MT252883 | This study |
| ZJUHW_202000052 | Ichneumonidae | Mesochorinae    | <i>Mesochorus</i> sp.1          | Jiangxi, China      | MT252884 | This study |
| ZJUHW_202000053 | Ichneumonidae | Mesochorinae    | <i>Mesochorus</i> sp.2          | Jiangxi, China      | MT252885 | This study |
| ZJUHW_202000054 | Ichneumonidae | Mesochorinae    | <i>Mesochorus</i> sp.3          | Henan, China        | MT252886 | This study |
| ZJUHW_202000055 | Ichneumonidae | Mesochorinae    | <i>Mesochorus testaceus</i>     | Yunnan, China       | MT252887 | This study |
| ZJUHW_202000056 | Ichneumonidae | Acaenitinae     | <i>Yamatarotes bicolor</i>      | Liaoning, China     | MT252888 | This study |
| ZJUHW_202000057 | Ichneumonidae | Acaenitinae     | <i>Jezarotes</i> sp.1           | Yunnan, China       | MT252889 | This study |
| ZJUHW_202000058 | Ichneumonidae | Acaenitinae     | <i>Jezarotes</i> sp.2           | Jilin, China        | MT252890 | This study |
| ZJUHW_202000059 | Ichneumonidae | Collyriinae     | <i>Bicurta</i> sp.              | Liaoning, China     | MT252891 | This study |
| ZJUHW_202000060 | Ichneumonidae | Ichneumoninae   | <i>Coelichneumon bivittatus</i> | Zhejiang, China     | MT302534 | This study |
| ZJUHW_202000061 | Ichneumonidae | Ichneumoninae   | <i>Vulgichneumon saevus</i>     | Tibet, China        | MT252892 | This study |
| ZJUHW_202000062 | Ichneumonidae | Ichneumoninae   | <i>Listrodromus</i> sp.         | Tibet, China        | MT252893 | This study |
| ZJUHW_202000063 | Ichneumonidae | Ichneumoninae   | <i>Oronotus</i> sp.             | Jiangxi, China      | MT252894 | This study |
| ZJUHW_202000064 | Ichneumonidae | Lycorininae     | <i>Lycorina triangulifera</i>   | Heilongjiang, China | MT252895 | This study |
| ZJUHW_202000065 | Ichneumonidae | Lycorininae     | <i>Lycorina</i> sp.             | Shandong, China     | MT252896 | This study |
| ZJUHW_202000066 | Ichneumonidae | Adelognathinae  | <i>Adelognathus</i> sp.         | Sichuan, China      | MT252897 | This study |
| ZJUHW_202000067 | Ichneumonidae | Orthocentrinae  | <i>Stenomacrus</i> sp.          | Sichuan, China      | MT252898 | This study |
| ZJUHW_202000068 | Ichneumonidae | Orthocentrinae  | <i>Plectiscus</i> sp.1          | Zhejiang, China     | MT252899 | This study |
| ZJUHW_202000069 | Ichneumonidae | Orthocentrinae  | <i>Orthocentrus</i> sp.         | Zhejiang, China     | MT252900 | This study |
| ZJUHW_202000070 | Ichneumonidae | Orthocentrinae  | <i>Plectiscus</i> sp.3          | Zhejiang, China     | MT252901 | This study |
| ZJUHW_202000071 | Ichneumonidae | Orthocentrinae  | <i>Plectiscidea</i> sp.         | Zhejiang, China     | MT252902 | This study |
| ZJUHW_202000072 | Ichneumonidae | Orthocentrinae  | <i>Plectiscus</i> sp.2          | Zhejiang, China     | MT252903 | This study |
| ZJUHW_202000073 | Ichneumonidae | Orthocentrinae  | <i>Proclitus</i> sp.            | Zhejiang, China     | MT252904 | This study |
| ZJUHW_202000074 | Ichneumonidae | Cremastinae     | <i>Trathala</i> sp.1            | Liaoning, China     | MT252905 | This study |
| ZJUHW_202000075 | Ichneumonidae | Cremastinae     | <i>Trathala</i> sp.2            | Yunnan, China       | MT252906 | This study |
| ZJUHW_202000076 | Ichneumonidae | Metopiinae      | <i>Colpotrochia</i> sp.         | Tibet, China        | MT252907 | This study |
| ZJUHW_202000077 | Ichneumonidae | Metopiinae      | <i>Hypsicera</i> sp.3           | Zhejiang, China     | MT252908 | This study |

|                 |                |                  |                                 |                  |          |                   |
|-----------------|----------------|------------------|---------------------------------|------------------|----------|-------------------|
| ZJUHW_202000078 | Ichneumonidae  | Metopiinae       | <i>Chorinaeus facilis</i>       | Guangdong, China | MT252909 | This study        |
| ZJUHW_202000079 | Ichneumonidae  | Metopiinae       | <i>Triclistus</i> sp.           | Guangdong, China | MT252910 | This study        |
| ZJUHW_202000080 | Ichneumonidae  | Metopiinae       | <i>Exochus</i> sp.              | Guangdong, China | MT252911 | This study        |
| ZJUHW_202000081 | Ichneumonidae  | Metopiinae       | <i>Hypsicera</i> sp.2           | Guangdong, China | MT252912 | This study        |
| ZJUHW_202000082 | Ichneumonidae  | Metopiinae       | <i>Metopius</i> sp.             | Henan, China     | MT252913 | This study        |
| ZJUHW_202000083 | Ichneumonidae  | Tersilochinae    | <i>Phradis</i> sp.              | Tibet, China     | MT252914 | This study        |
| ZJUHW_202000084 | Ichneumonidae  | Tersilochinae    | <i>Probles</i> sp.1             | Sichuan, China   | MT252915 | This study        |
| ZJUHW_202000085 | Ichneumonidae  | Tersilochinae    | <i>Probles</i> sp.2             | Gansu, China     | MT302535 | This study        |
| ZJUHW_202000086 | Ichneumonidae  | Brachycyrtinae   | <i>Brachycyrtus ornatus</i>     | Liaoning, China  | MT252916 | This study        |
| ZJUHW_202000087 | Ichneumonidae  | Tryphoninae      | <i>Netelia</i> sp.1             | Hainan, China    | MT252917 | This study        |
| ZJUHW_202000088 | Ichneumonidae  | Tryphoninae      | <i>Netelia</i> sp.2             | Liaoning, China  | MT252918 | This study        |
| ZJUHW_202000089 | Ichneumonidae  | Tryphoninae      | <i>Eridolius</i> sp.            | Zhejiang, China  | MT252919 | This study        |
| ZJUHW_202000090 | Ichneumonidae  | Tryphoninae      | <i>Dyspetes luteomarginatus</i> | Sichuan, China   | MT252920 | This study        |
| ZJUHW_202000091 | Ichneumonidae  | Tryphoninae      | <i>Atopotrophos bucephalus</i>  | Liaoning, China  | MT252921 | This study        |
| ZJUHW_202000092 | Ichneumonidae  | Tryphoninae      | <i>Oedemopsis</i> sp.           | Zhejiang, China  | MT252922 | This study        |
| ZJUHW_202000093 | Ichneumonidae  | Oxytorinae       | <i>Oxytorus luridator</i>       | Zhejiang, China  | MT252923 | This study        |
| ZJUHW_202000094 | Ichneumonidae  | Nesomesochorinae | <i>Klutiana</i> sp.             | Jilin, China     | MT252924 | This study        |
| ZJUHW_202000095 | Ichneumonidae  | Pimplinae        | <i>Theronia laevigata</i>       | Liaoning, China  | MT252925 | This study        |
| ZJUHW_202000096 | Ichneumonidae  | Diplazontinae    | <i>Syrphoctonus nigratarsus</i> | Sichuan, China   | MT252926 | This study        |
| ZJUHW_202000097 | Ichneumonidae  | Cryptinae        | <i>Hidryta fusiventris</i>      | Liaoning, China  | MT302536 | This study        |
| ZJUHW_202000098 | Ichneumonidae  | Phygadeuontinae  | <i>Acrolyta</i> sp.             | Liaoning, China  | MT302537 | This study        |
| ——              | Ichneumonidae  | Ichneumoninae    | <i>Amblyjoppa</i> sp.           | ——               | MG923483 | Tang et al. [1]   |
| ——              | Aulacidae      | ——               | <i>Aulacus sinensis</i>         | ——               | MG923485 | Tang et al. [1]   |
| ——              | Braconidae     | Microgastrinae   | <i>Cotesia vestalis</i>         | ——               | FJ154897 | Wei et al. [2]    |
| ——              | Ichneumonidae  | Campopleginae    | <i>Diadegma semiclausum</i>     | ——               | EU871947 | Wei et al. [3]    |
| ——              | Ichneumonidae  | Ichneumoninae    | <i>Diadromus collaris</i>       | ——               | JX131613 | Li et al. [4]     |
| ——              | Ichneumonidae  | Ophioninae       | <i>Enicospilus</i> sp.1         | ——               | FJ478177 | Dowton et al. [5] |
| ——              | Gasteruptiidae | ——               | <i>Gasteruption</i> sp.         | ——               | KJ619460 | Mao et al. [6]    |
| ——              | Ichneumonidae  | Campopleginae    | <i>Hyposoter</i> sp.            | ——               | MG923499 | Tang et al. [1]   |
| ——              | Ichneumonidae  | Metopiinae       | <i>Hypsicera</i> sp.1           | ——               | MG923500 | Tang et al. [1]   |
| ——              | Trigonalidae   | ——               | <i>Orthogonalys pulchella</i>   | ——               | KJ619461 | Mao et al. [6]    |
| ——              | Ichneumonidae  | Pimplinae        | <i>Pimpla luctuosa</i>          | ——               | MG923506 | Tang et al. [1]   |
| ——              | Aulacidae      | ——               | <i>Pristaulacus compressus</i>  | ——               | KF500406 | Wei et al. [7]    |
| ——              | Braconidae     | Doryctinae       | <i>Spathius agrili</i>          | ——               | FJ387020 | Wei et al. [2]    |
| ——              | Trigonalidae   | ——               | <i>Taeniogonals taihorina</i>   | ——               | KJ684986 | Wu et al. [8]     |
| ——              | Ichneumonidae  | Campopleginae    | <i>Venturia canescens</i>       | ——               | FJ478176 | Dowton et al. [5] |
| ——              | Braconidae     | Meteorinae       | <i>Zelex chlorophthalmus</i>    | ——               | MG822749 | Direct Submission |

**Note:** “——” represent that information is unknown or null for subfamilies.

**Table S2** Information for the mitochondrial genomes exclude Ichneumonidae used for comparative analysis.

| Sequence Name                      | Superfamily      | Family            | Accession Number | Reference            |
|------------------------------------|------------------|-------------------|------------------|----------------------|
| <i>Alloxysta</i> sp.               | Cynipoidea       | Figitidae         | MG923482         | Tang et al. [1]      |
| <i>Aulacus sinensis</i>            | Evanioidea       | Aulacidae         | MG923485         | Tang et al. [1]      |
| <i>Belyta</i> sp.                  | Diaprioidea      | Diapriidae        | MG923486         | Tang et al. [1]      |
| <i>Brachymeria</i> sp.             | Chalcidoidea     | Chalcididae       | MG923487         | Tang et al. [1]      |
| <i>Ceraphron</i> sp.               | Ceraphronoidea   | Ceraphronidae     | KJ570858         | Mao et al. [6]       |
| <i>Ceraphronidae</i> sp.           | Ceraphronoidea   | Ceraphronidae     | MG923488         | Tang et al. [1]      |
| <i>Ceratobaeus</i> sp.             | Platygaстроidea  | Platygastridae    | KF696669         | Mao and Dowton [9]   |
| <i>Conostigmus</i> sp.             | Ceraphronoidea   | Megaspilidae      | KF015227         | Mao et al. [10]      |
| <i>Cotesia vestalis</i>            | Ichneumonoidea   | Braconidae        | FJ154897         | Wei et al. [2]       |
| <i>Dendrocercus</i> sp.            | Ceraphronoidea   | Megaspilidae      | MG923490         | Tang et al. [1]      |
| <i>Diapriidae</i> sp.              | Diaprioidea      | Diapriidae        | MG923491         | Tang et al. [1]      |
| <i>Etchellsia sinica</i>           | Megalyroidea     | Megalyridae       | KR270641         | Tang et al. [1]      |
| <i>Eupelmus</i> sp.                | Chalcidoidea     | Eupelmidae        | MG923493         | Tang et al. [1]      |
| <i>Eurytoma</i> sp.                | Chalcidoidea     | Eurytomidae       | MG923494         | Tang et al. [1]      |
| <i>Evania appendigaster</i>        | Evanioidea       | Evanidae          | FJ593187         | Wei et al. [11]      |
| <i>Exallonyx</i> sp.               | Proctotrupeoidea | Proctotrupidae    | MG923495         | Tang et al. [1]      |
| <i>Foenatopus ruficollis</i>       | Stephanoidea     | Stephanidae       | KR270642         | Tang et al. [1]      |
| <i>Gasteruption parvicollarium</i> | Evanioidea       | Gasteruptionidae  | KR270643         | Tang et al. [1]      |
| <i>Gasteruption</i> sp.            | Evanioidea       | Gasteruptionidae  | KJ619460         | Mao et al. [10]      |
| <i>Gasteruption tournieri</i>      | Evanioidea       | Gasteruptionidae  | MG923496         | Tang et al. [1]      |
| <i>Gastraspis</i> sp.              | Cynipoidea       | Figitidae         | MG923497         | Tang et al. [1]      |
| <i>Helorus</i> sp.                 | Proctotrupeoidea | Heloridae         | MG923498         | Tang et al. [1]      |
| <i>Ibalia leucospoides</i>         | Cynipoidea       | Ibaliidae         | KJ814197         | Mao et al. [12]      |
| <i>Idris</i> sp.                   | Platygaстроidea  | Platygastridae    | KF696670         | Mao and Dowton [9]   |
| <i>Ismarus</i> sp.                 | Diaprioidea      | Diapriidae        | MG923501         | Tang et al. [1]      |
| <i>Leptopilina boulardi</i>        | Cynipoidea       | Figitidae         | KU665622         | Oliveira et al. [13] |
| <i>Megalyra</i> sp.                | Megalyroidea     | Megalyridae       | KJ577600         | Mao et al. [6]       |
| <i>Megaphragma amalphantum</i>     | Chalcidoidea     | Trichogrammatidae | KT373787         | Direct Submission    |
| <i>Megaspilidae</i> sp.            | Ceraphronoidea   | Megaspilidae      | MG923503         | Tang et al. [1]      |
| <i>Monomachus antipodalis</i>      | Diaprioidea      | Monomachidae      | KM104168         | Mao et al. [12]      |
| <i>Orthogonalys pulchella</i>      | Trigonalyoidea   | Trigonalyidae     | KJ619461         | Mao et al. [6]       |
| <i>Pelecinus polyturator</i>       | Proctotrupeoidea | Pelecinidae       | KM104167         | Mao et al. [12]      |
| <i>Philotrypesis pilosa</i>        | Chalcidoidea     | Aganidae          | JF808723         | Xiao et al. [14]     |

|                                     |                 |                |          |                    |
|-------------------------------------|-----------------|----------------|----------|--------------------|
| Platygastridae sp1                  | Platygastroidea | Platygastridae | MG923508 | Tang et al. [1]    |
| Platygastridae sp2                  | Platygastroidea | Platygastridae | MG923509 | Tang et al. [1]    |
| Platygastridae sp3                  | Platygastroidea | Platygastridae | MG923510 | Tang et al. [1]    |
| <i>Pristaulacus compressus</i>      | Evanioidea      | Aulacidae      | NC022849 | Wei et al. [7]     |
| <i>Prosevania</i> sp.               | Evanioidea      | Evanidae       | MG923512 | Tang et al. [1]    |
| <i>Pteromalus puparum</i>           | Chalcidoidea    | Pteromalidae   | MG923513 | Tang et al. [1]    |
| <i>Schlettererius cinctipes</i>     | Stephanoidea    | Stephanidae    | FJ478175 | Dowton et al. [15] |
| <i>Synergus</i> sp.                 | Cynipoidea      | Cynipidae      | MG923514 | Tang et al. [1]    |
| <i>Taeniogonalos taihorina</i>      | Trigonalioidea  | Trigonalidae   | KJ684986 | Wu et al. [8]      |
| <i>Taeniogonalos tricolor</i>       | Trigonalioidea  | Trigonalidae   | MG923515 | Tang et al. [1]    |
| <i>Telenomus dignus</i>             | Platygastroidea | Scelionidae    | KR270640 | Direct Submission  |
| <i>Trissolcus basalis</i>           | Platygastroidea | Scelionidae    | JN903532 | Mao et al. [16]    |
| <i>Vanhornia eucnemidarum</i>       | Proctotrupoidea | Vanhorniidae   | DQ302100 | Castro et al. [17] |
| <i>Acanthormius</i> sp.             | Ichneumonoidea  | Braconidae     | KF385867 | Li et al. [18]     |
| <i>Afrocampsis griseosetosus</i>    | Ichneumonoidea  | Braconidae     | KJ412474 | Li et al. [18]     |
| <i>Aphidius gifuensis</i>           | Ichneumonoidea  | Braconidae     | GU097658 | Wei et al. [2]     |
| <i>Capitoni</i> sp.                 | Ichneumonoidea  | Braconidae     | KF385869 | Li et al. [18]     |
| <i>Cardiochiles fuscipennis</i>     | Ichneumonoidea  | Braconidae     | KF385870 | Li et al. [18]     |
| <i>Cotesia vestalis</i>             | Ichneumonoidea  | Braconidae     | FJ154897 | Wei et al. [2]     |
| <i>Diachasmimorpha longicaudata</i> | Ichneumonoidea  | Braconidae     | GU097655 | Wei et al. [2]     |
| <i>Elasmosoma</i> sp.               | Ichneumonoidea  | Braconidae     | KJ412470 | Li et al. [18]     |
| <i>Eumacrocentrus</i> sp.           | Ichneumonoidea  | Braconidae     | KF385872 | Li et al. [18]     |
| <i>Euurobracon breviterebrae</i>    | Ichneumonoidea  | Braconidae     | KF385871 | Li et al. [18]     |
| <i>Histeromerus</i> sp.             | Ichneumonoidea  | Braconidae     | KF418765 | Li et al. [18]     |
| <i>Homolobus</i> sp.                | Ichneumonoidea  | Braconidae     | KF385873 | Li et al. [18]     |
| <i>Ichneutes</i> sp.                | Ichneumonoidea  | Braconidae     | KF385874 | Li et al. [18]     |
| <i>Macrocentrus camphoraphilus</i>  | Ichneumonoidea  | Braconidae     | GU097656 | Wei et al. [2]     |
| <i>Meteorus pulchricornis</i>       | Ichneumonoidea  | Braconidae     | GU097657 | Wei et al. [2]     |
| <i>Mirax</i> sp.                    | Ichneumonoidea  | Braconidae     | KJ412471 | Li et al. [18]     |
| <i>Pambolus</i> sp.                 | Ichneumonoidea  | Braconidae     | KF385875 | Li et al. [18]     |
| <i>Paroligoneurus</i> sp.           | Ichneumonoidea  | Braconidae     | KJ412472 | Li et al. [18]     |
| <i>Phanerotoma flava</i>            | Ichneumonoidea  | Braconidae     | GU097654 | Wei et al. [2]     |
| <i>Proterops</i> sp.                | Ichneumonoidea  | Braconidae     | KJ412477 | Li et al. [18]     |
| <i>Pselaphanus</i> sp.              | Ichneumonoidea  | Braconidae     | KF385876 | Li et al. [18]     |
| <i>Pseudognaptodon</i> sp.          | Ichneumonoidea  | Braconidae     | KJ412473 | Li et al. [18]     |
| <i>Sigalphus bicolor</i>            | Ichneumonoidea  | Braconidae     | KF385878 | Li et al. [18]     |
| <i>Spathius agrili</i>              | Ichneumonoidea  | Braconidae     | FJ387020 | Wei et al. [2]     |
| <i>Therophilus festivus</i>         | Ichneumonoidea  | Braconidae     | KF385868 | Li et al. [18]     |

|                             |                |            |          |                   |
|-----------------------------|----------------|------------|----------|-------------------|
| <i>Triraphis</i> sp.        | Ichneumonoidea | Braconidae | KF385877 | Li et al. [18]    |
| <i>Zele chlorophthalmus</i> | Ichneumonoidea | Braconidae | MG822749 | Direct Submission |

**Table S3** Partitions and their best model list.

| Types | Partition Names | Gene of Sequences             | Sites       | Best Model from Modelfinder |
|-------|-----------------|-------------------------------|-------------|-----------------------------|
| AA    | c1              | Cytochrome oxidase subunit 1  | 1951-2475   | mtART+F+R7                  |
| AA    | c2              | Cytochrome oxidase subunit 2  | 1721-1950   | mtART+F+R6                  |
| AA    | cb              | Cytochrome b                  | 3052-3425   | mtART+F+R6                  |
| AA    | a6              | ATP synthase protein 6        | 2476-2693   | mtART+F+R6                  |
| AA    | n3              | NADH dehydrogenase subunit 3  | 2694-2796   | mtMet+F+I                   |
| AA    | n2              | NADH dehydrogenase subunit 2  | 2797-3051   | mtZOA+F+R6                  |
| AA    | a8              | ATP synthase protein 8        | 792-828     | mtZOA+F+I                   |
| AA    | c3              | Cytochrome oxidase subunit 3  | 524-791     | mtART+F+R6                  |
| AA    | n6              | NADH dehydrogenase subunit 6  | 404-523     | mtMet+F+R5                  |
| AA    | n4              | NADH dehydrogenase subunit 4  | 1-403       | mtInv+F+R7                  |
| AA    | n4l             | NADH dehydrogenase subunit 4L | 1632-1720   | mtInv+F+G4                  |
| AA    | n5              | NADH dehydrogenase subunit 5  | 829-1320    | mtInv+F+R8                  |
| AA    | n1              | NADH dehydrogenase subunit 1  | 1321-1631   | mtZOA+F+R7                  |
| NU    | n3p2            | NADH dehydrogenase subunit 3  | 8024-8165   | TVM+F+I+G4                  |
| NU    | a6p3            | ATP synthase protein 6        | 8513-8766   | TIM2+F+R6                   |
| NU    | n2p2            | NADH dehydrogenase subunit 2  | 8767-9187   | GTR+F+R4                    |
| NU    | c3p1            | Cytochrome oxidase subunit 3  | 8166-8512   | GTR+F+R5                    |
| NU    | n4lp2           | NADH dehydrogenase subunit 4L | 7453-7559   | TVM+F+G4:                   |
| NU    | n4p3            | NADH dehydrogenase subunit 4  | 7560-8023   | TIM+F+R6                    |
| NU    | c1p3            | Cytochrome oxidase subunit 1  | 6309-6802   | TPM2+F+R7                   |
| NU    | n2p1            | NADH dehydrogenase subunit 2  | 6803-7223   | K3Pu+F+R4                   |
| NU    | cbp1            | Cytochrome b                  | 5938-6308   | GTR+F+R5                    |
| NU    | c2p2            | Cytochrome oxidase subunit 2  | 7224-7452   | GTR+F+R4                    |
| NU    | c3p3            | Cytochrome oxidase subunit 3  | 5591-5937   | TIM2+F+R6                   |
| NU    | c2p1            | Cytochrome oxidase subunit 2  | 11967-12195 | GTR+F+I+G4                  |
| NU    | n6p1            | ATP synthase protein 6        | 11716-11966 | GTR+F+R5                    |
| NU    | n5p3            | NADH dehydrogenase subunit 5  | 11084-11715 | TVM+F+R6                    |
| NU    | a8p3            | ATP synthase protein 8        | 11015-11083 | K3Pu+F+R3                   |

|    |       |                               |             |            |
|----|-------|-------------------------------|-------------|------------|
| NU | n3p1  | NADH dehydrogenase subunit 3  | 10873-11014 | GTR+F+I+G4 |
| NU | n5p1  | NADH dehydrogenase subunit 5  | 10241-10872 | GTR+F+R6   |
| NU | n5p2  | NADH dehydrogenase subunit 5  | 9609-10240  | GTR+F+I+G4 |
| NU | n2p3  | NADH dehydrogenase subunit 2  | 9188-9608   | K3Pu+F+R5  |
| NU | cbp3  | Cytochrome b                  | 2631-3001   | TN+F+R6    |
| NU | n4p1  | NADH dehydrogenase subunit 4  | 1938-2401   | GTR+F+I+G4 |
| NU | c2p3  | Cytochrome oxidase subunit 2  | 2402-2630   | TIM2+F+R5  |
| NU | cbp2  | Cytochrome b                  | 720-1090    | GTR+F+R5   |
| NU | a8p2  | ATP synthase protein 8        | 1091-1159   | TIM3+F+R4  |
| NU | a6p1  | ATP synthase protein 6        | 359-612     | TIM+F+R5   |
| NU | n4lp3 | NADH dehydrogenase subunit 4L | 613-719     | TIM3+F+G4: |
| NU | c1p1  | Cytochrome oxidase subunit 1  | 1160-1653   | GTR+F+I+G4 |
| NU | n1p1  | NADH dehydrogenase subunit 1  | 1654-1937   | GTR+F+R6   |
| NU | n4lp1 | NADH dehydrogenase subunit 4L | 1-107       | TVM+F+G4:  |
| NU | n6p2  | NADH dehydrogenase subunit 6  | 108-358     | GTR+F+I+G4 |
| NU | n1p3  | NADH dehydrogenase subunit 1  | 4813-5096   | HKY+F+R6   |
| NU | c1p2  | Cytochrome oxidase subunit 1  | 5097-5590   | TVM+F+R5   |
| NU | n6p3  | NADH dehydrogenase subunit 6  | 3682-3932   | TN+F+R4    |
| NU | c3p2  | Cytochrome oxidase subunit 3  | 3933-4279   | GTR+F+R6   |
| NU | a8p1  | ATP synthase protein 8        | 4280-4348   | TPM2+F+R4  |
| NU | n4p2  | NADH dehydrogenase subunit 4  | 4349-4812   | GTR+F+I+G4 |
| NU | n1p2  | NADH dehydrogenase subunit 1  | 3256-3539   | GTR+F+I+G4 |
| NU | n3p3  | NADH dehydrogenase subunit 3  | 3540-3681   | TIM2+F+R5  |
| NU | a6p2  | ATP synthase protein 6        | 3002-3255   | TVM+F+I+G4 |

---

**Note:** Best models of 39 nucleic acids partitions (NU, every protein-coding gene was part to tree partitions according coding sites of p1, p2 and p3) and 13 amino acids partitions (AA) of 13 protein-coding genes in mitochondrial genomes from ModelFinder.

## Supplementary Figures (S1- S11)

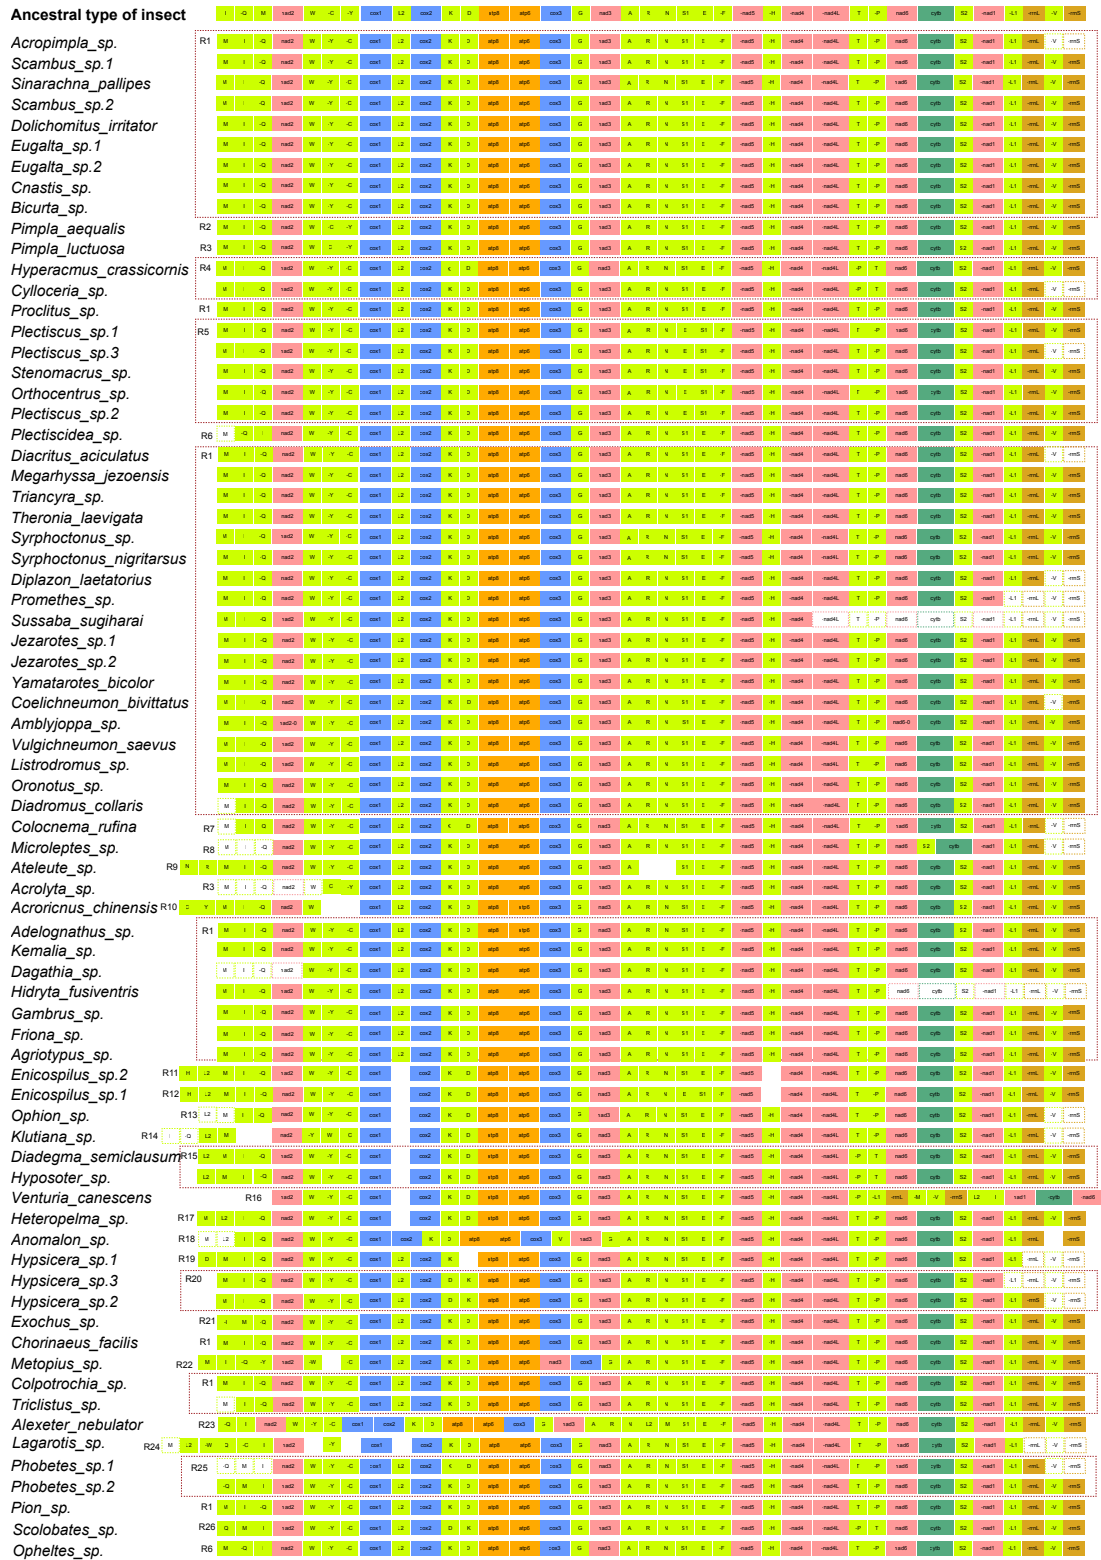

continued

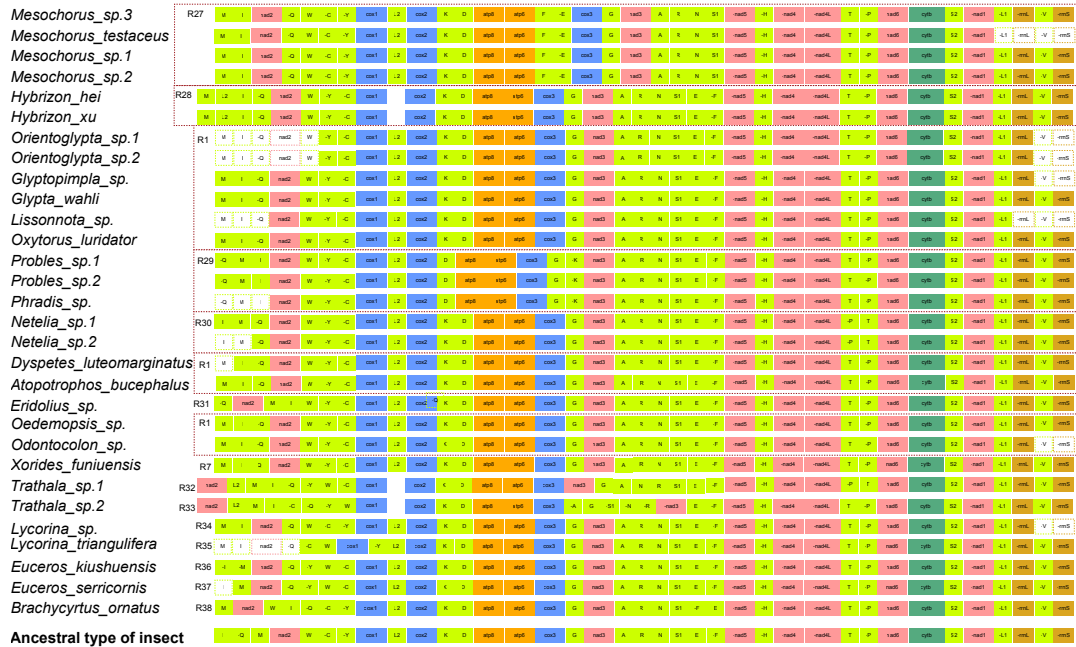

**Figure S1** The mitochondrial genes arrangement pattern of Ichneumonidae. There are 38 types of the rearrangement pattern (R1-R38).

Lines in front of gene names indicate the gene coding on the minority strand. The genes sequenced failed are filled by blank blocks. The *cox1*-*cox3*: cytochrome oxidase subunits; *cob*: cytochrome b; *nad1*-*nad6*: NADH dehydrogenase components; *rrnL* and *rrnS*: ribosomal RNAs. Single letters identify the transfer RNA genes – refer to the IPUC-IUB (International Union of Pure and Applied Chemistry-International Union of Biochemistry) single-letter amino acid codes.



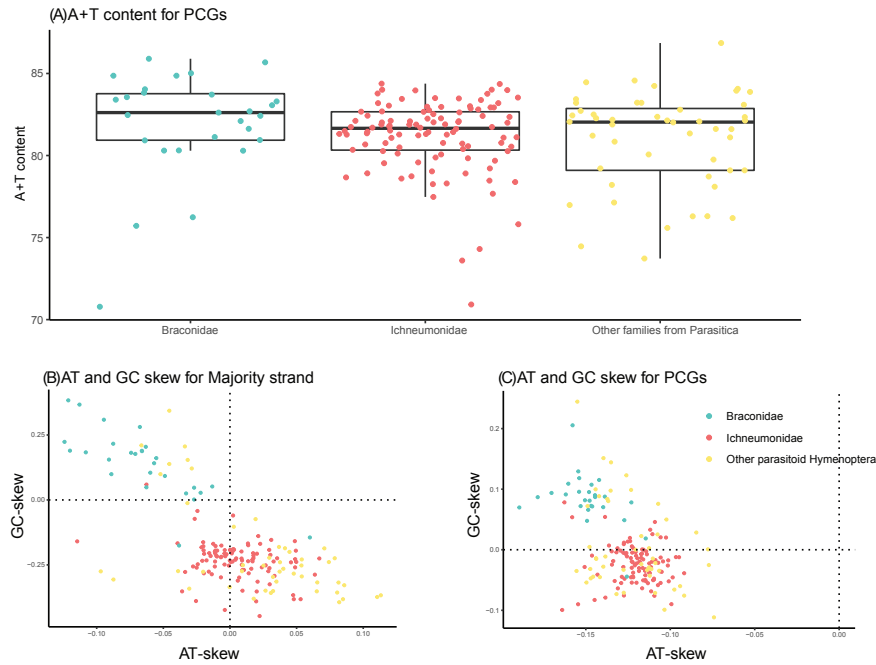

**Figure S2** Base composition of the majority strand and the protein-coding genes (PCGs) of mitochondrial genomes for Ichneumonidae, Braconidae and other parasitoid Hymenoptera.

(A) A + T content for the PCGs. (B) GC-skew against AT-skew of the majority strand. (C) GC-skew against AT-skew of PCGs. Each species is indicated by a filled circle.

**The ts against tv on 1st sites of PCG**

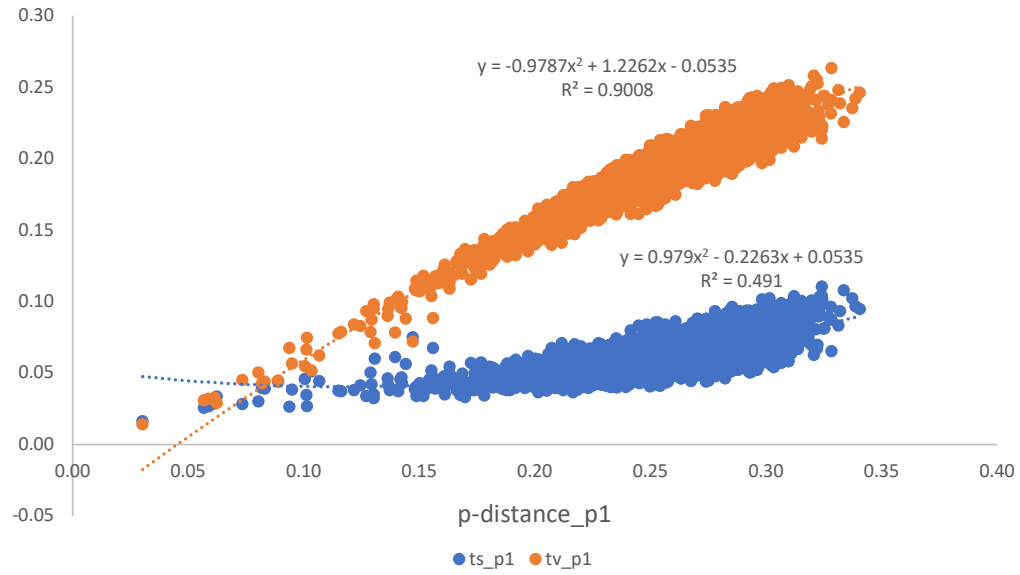

### The ts against tv on 2nd sites of PCG

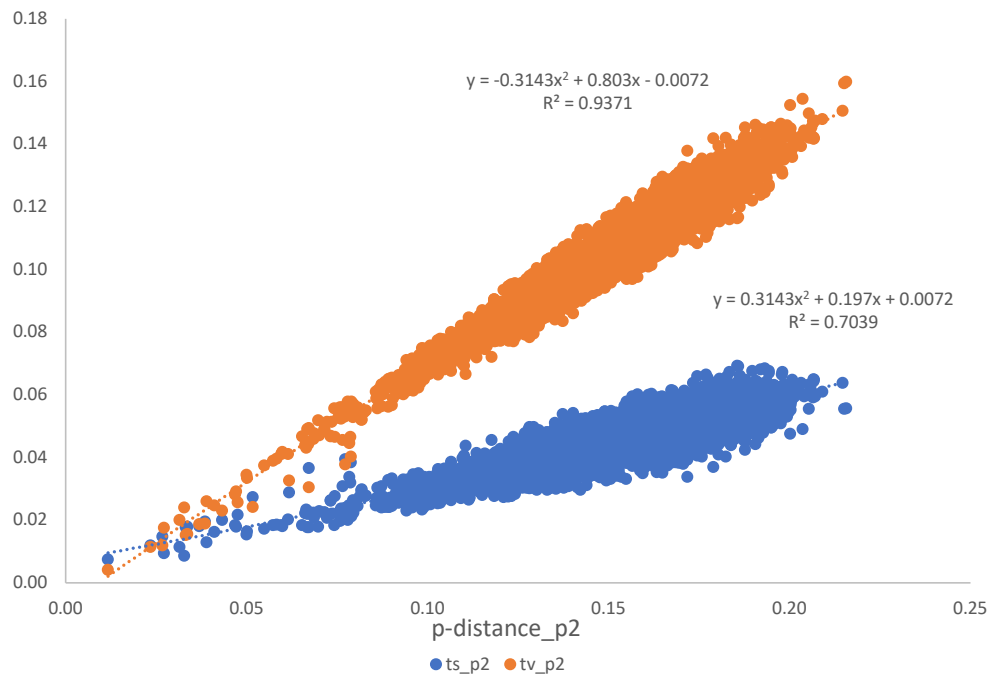

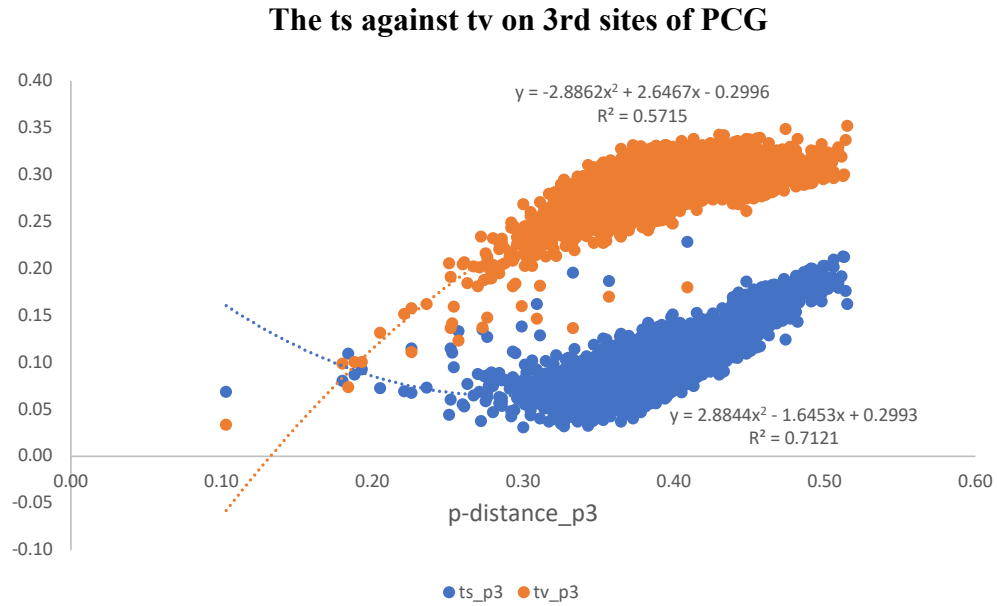

**Figure S3** The base substitutional saturation plots of 1st, 2nd and 3rd sites for 13 protein-coding genes (PCGs).

The transitions (ts, blue) and transversions (tv, orange) against p- distance of both them, respectively.



**(A) AA matrix**

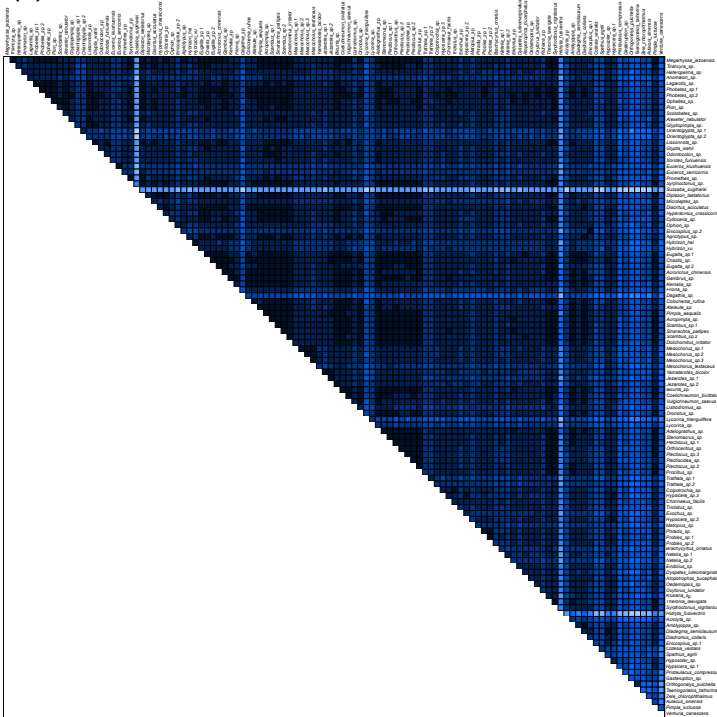

**(B) NU matrix**

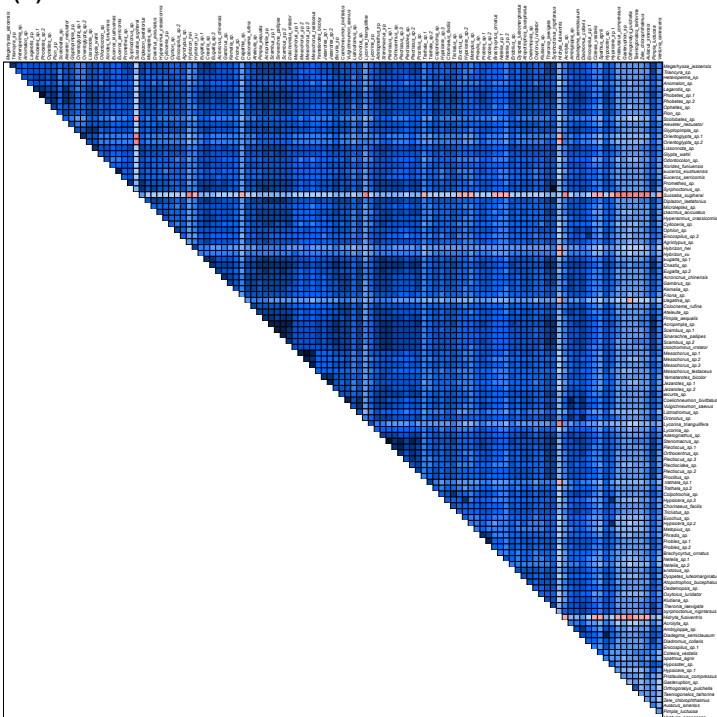

**Figure S4** Heterogeneity analysis for AA and NU matrixes.

The mean similarity score between pairs of sequences is represented by a colored square, the red indicating great difference in sequence composition compared with the remainder and the blue indicating high similarity.

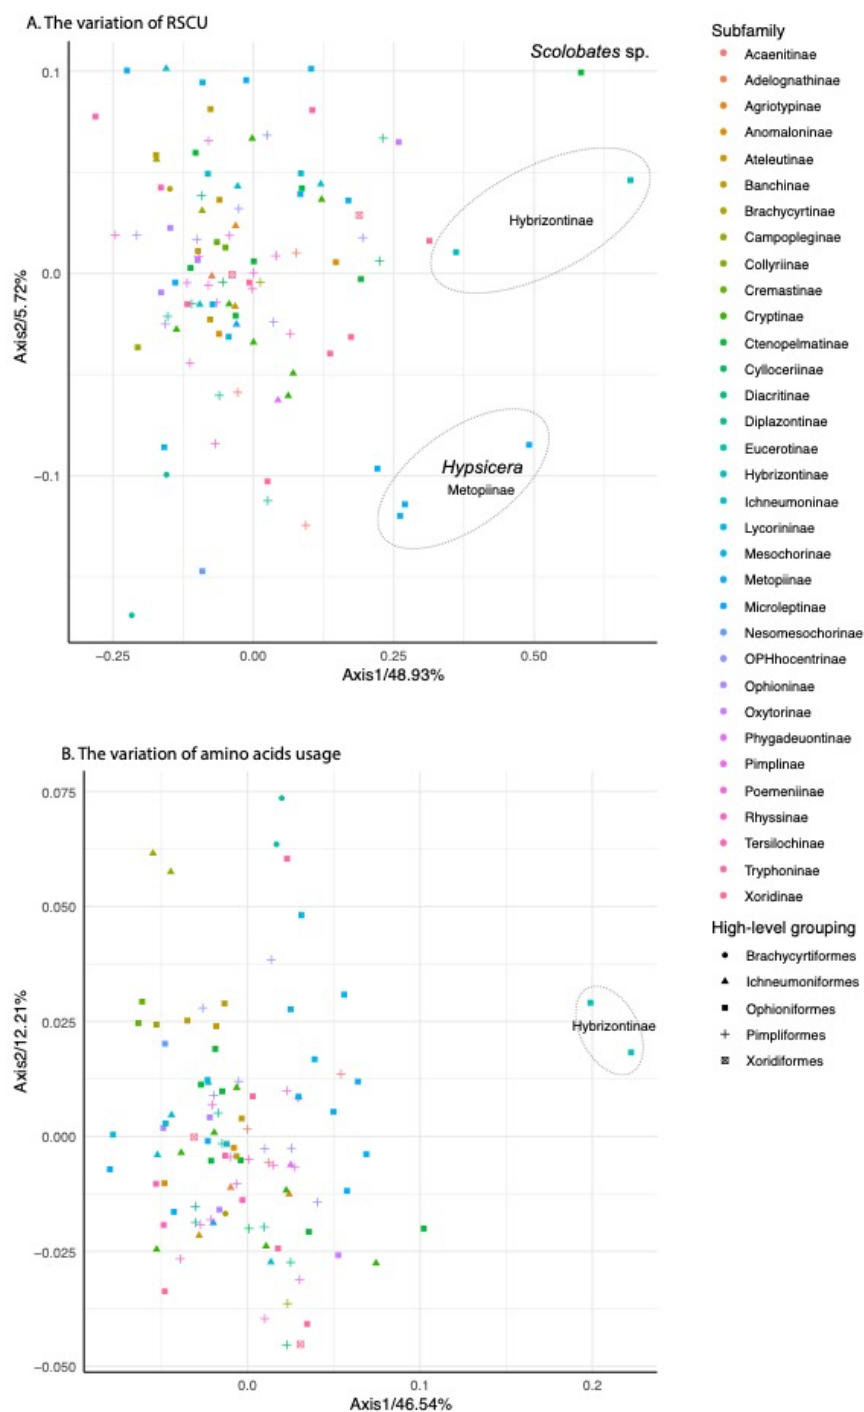

**Figure S5** Ordination of 104 ichneumonid sequences on the two principal correspondence analysis axes.

The subfamilies are marked by different colors and the high-level groupings by shapes. The abnormal species are demonstrated by its position on Axis1 (circled and labeled). (A) There are 61 axes generated by CodonW using the codon usage of the 61 synonymous codonsamino acids. The total inertia of the RSCU is 0.055423. The explanation of the variation of Axis1 is 48.93% and Axis2 is 5.72%, others lower than 5%. (B) There are 19 axes generated by CodonW using 20 amino acids. The total inertia of the amino acid usage is 0.004531. The explanation of the variation of Axis1 is 46.54% and Axis2 is 12.21%, others lower than 10%.

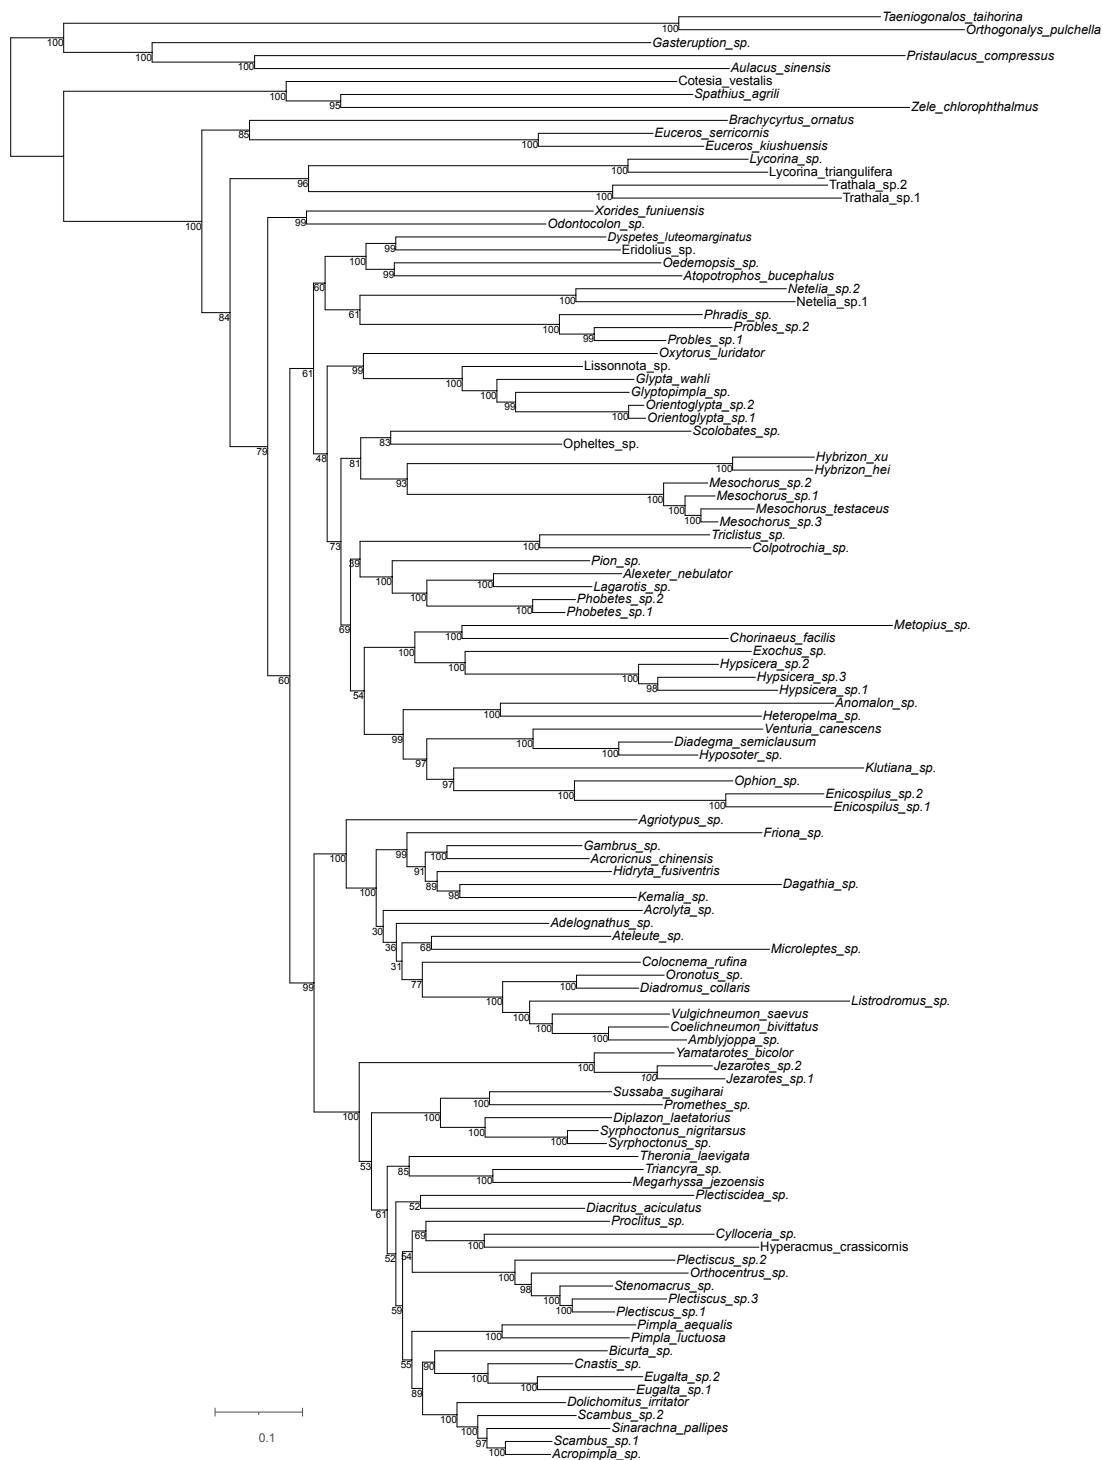

**Figure S6** Phylogenetic relationships of Ichneumonid wasps inferred from amino acid sequences of 13 protein-coding genes in mitochondrial genomes (AA matrix) by ML method. Numbers close to the nodes are the ultrafast bootstrap values.

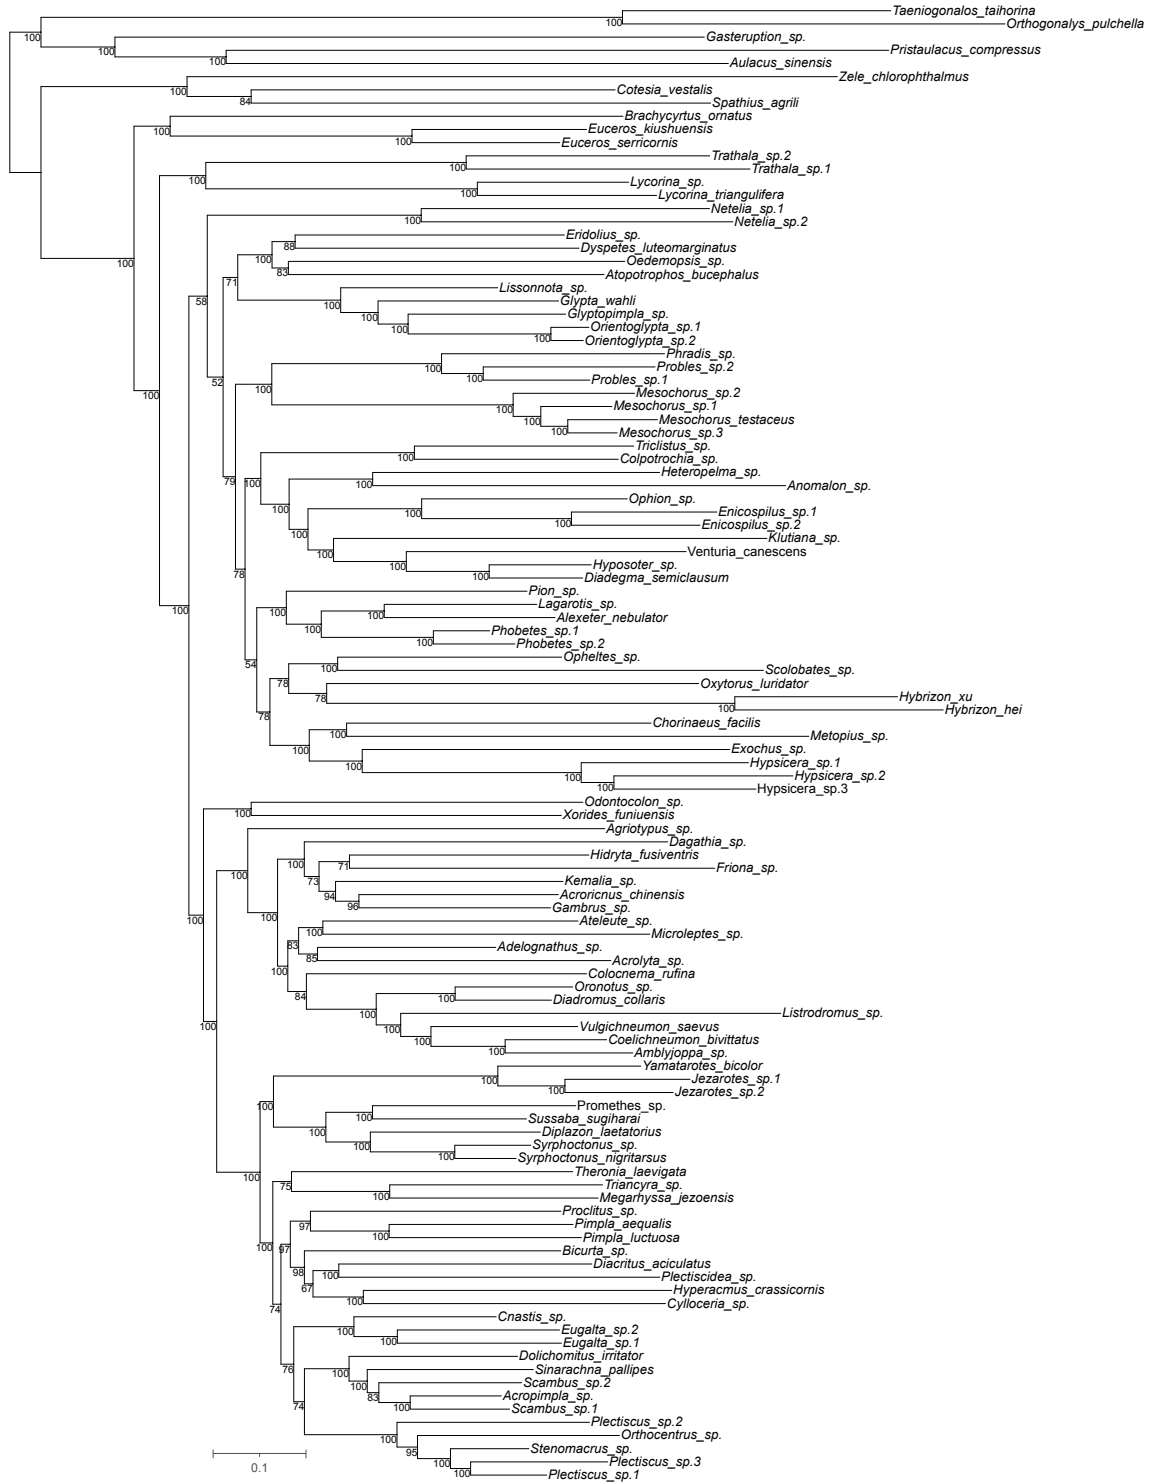



**Figure S7** Phylogenetic relationships of Ichneumonid wasps inferred from nucleotide sequences of 13 protein-coding genes in mitochondrial genomes (NU matrix) by BI inference.

Numbers close to the nodes are Bayesian posterior probabilities.

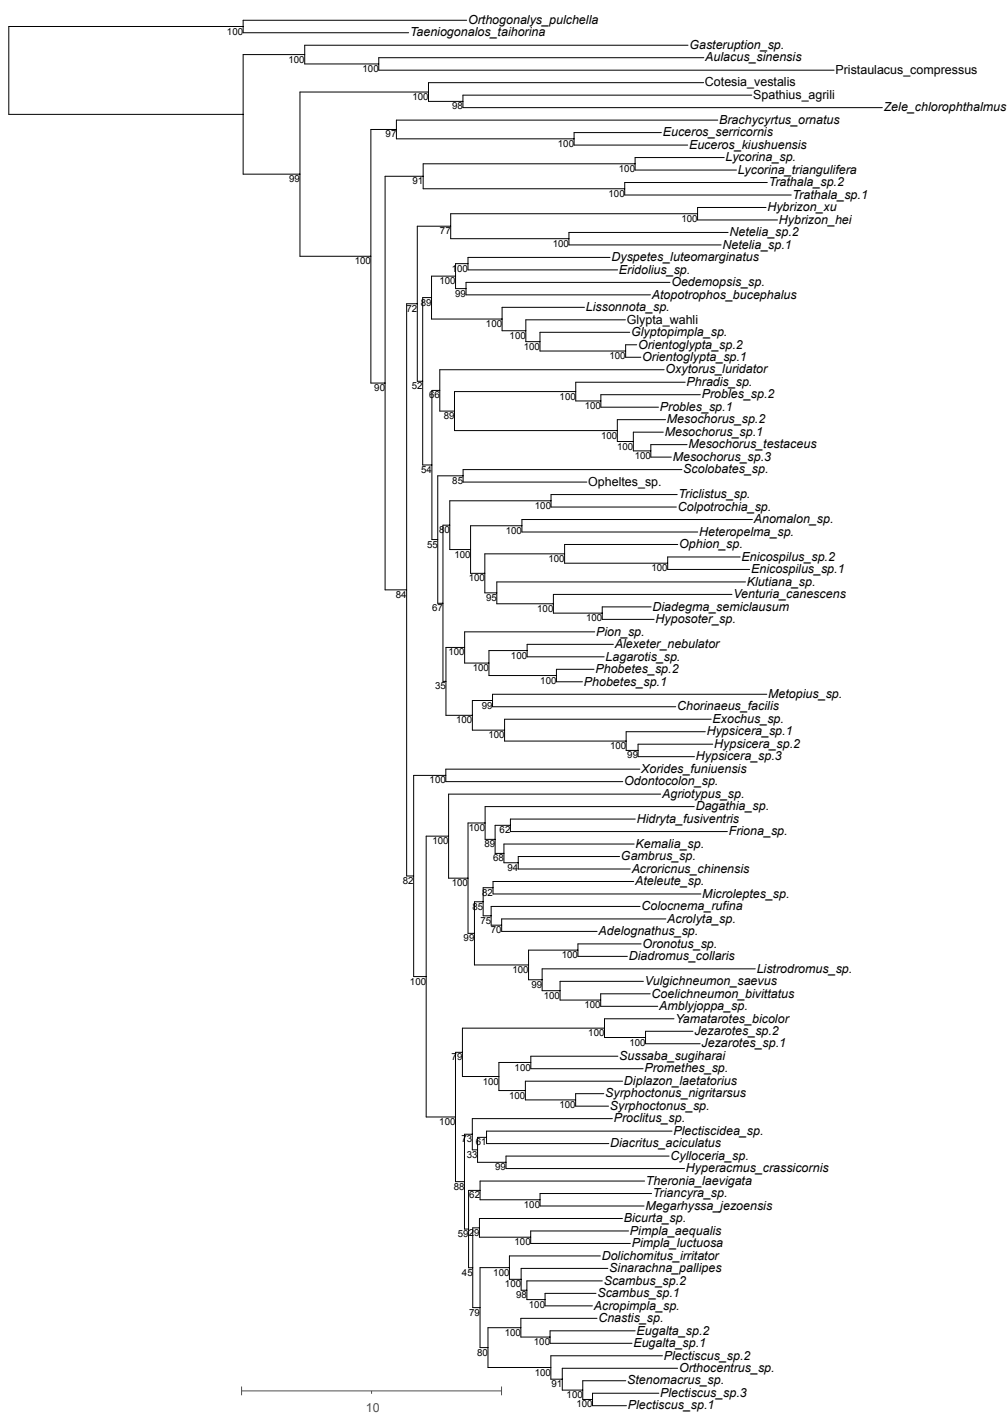

**Figure S8** Phylogenetic relationships of Ichneumonid wasps inferred from nucleotide sequences of 13 protein-coding genes in mitochondrial genomes (NU matrix) by ML method.

Numbers close to the nodes are the ultrafast bootstrap values.

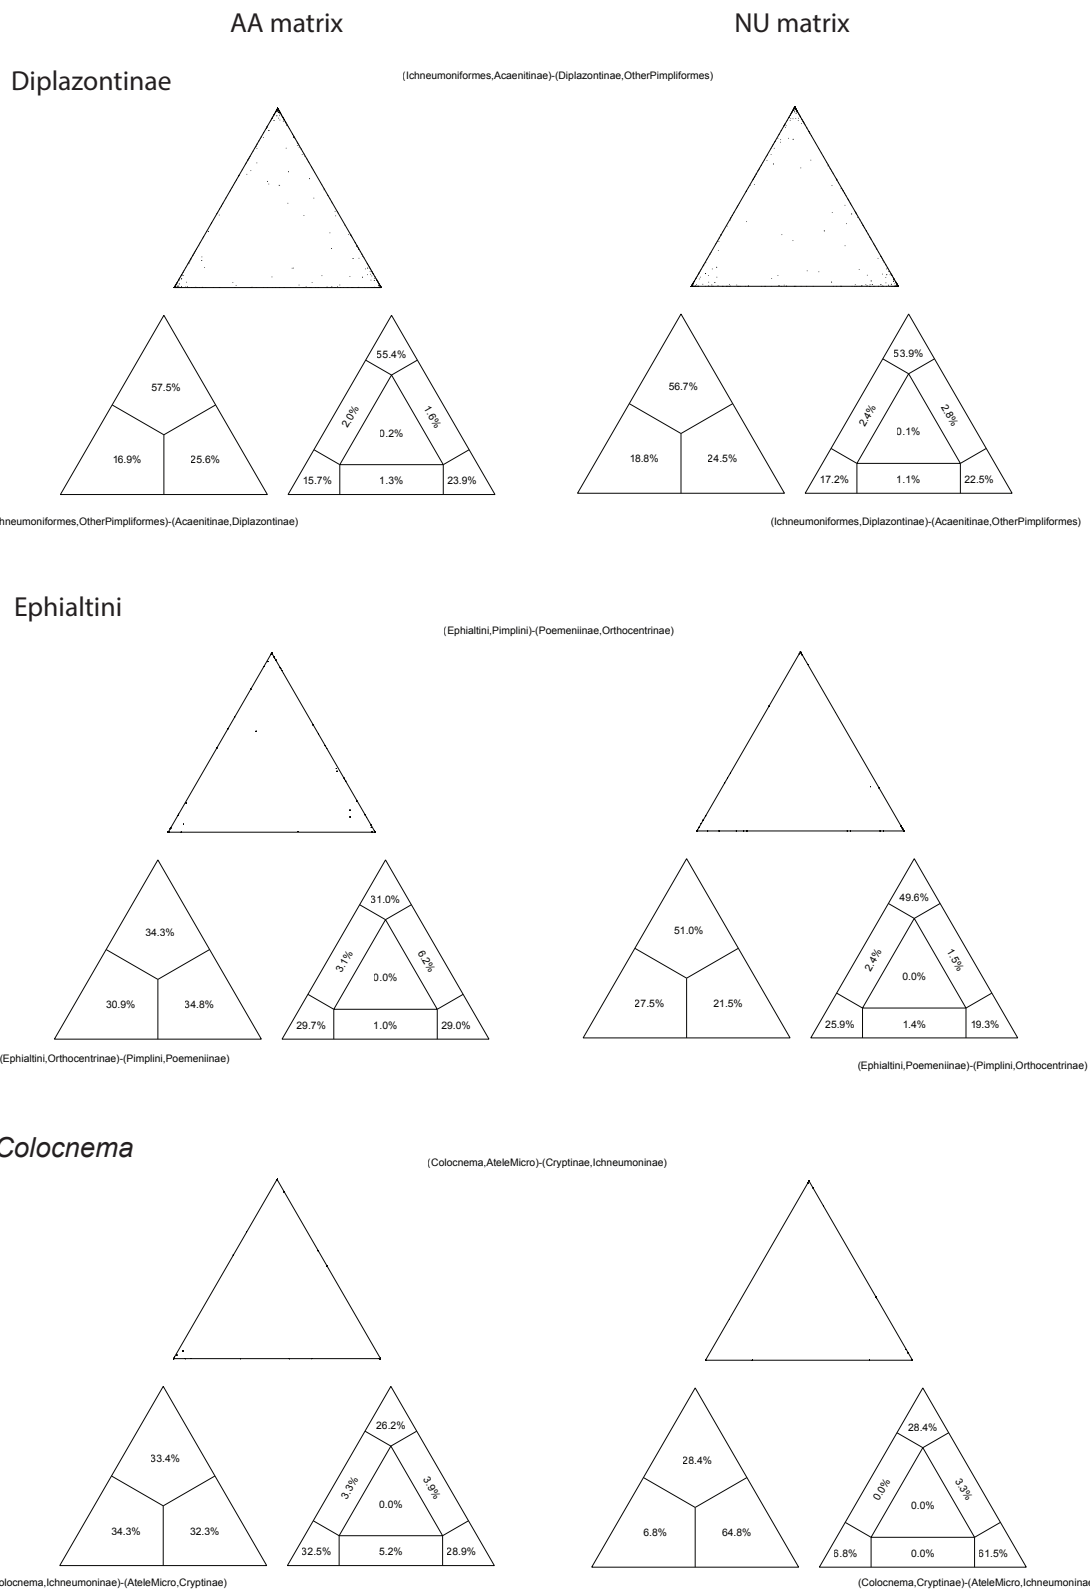

continued

## AA matrix

## NU matrix

### Metopiinae

(Meto,CamOphAno)-(Ctenopelmatinae,Metopiinae)

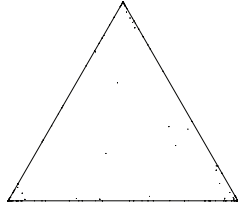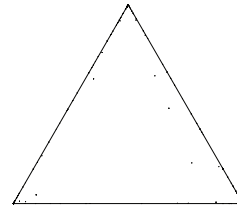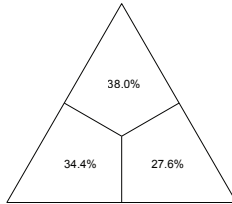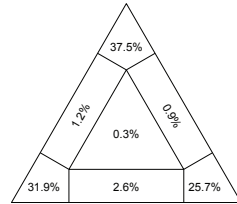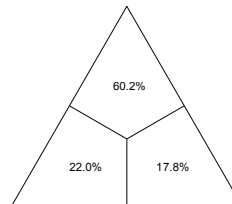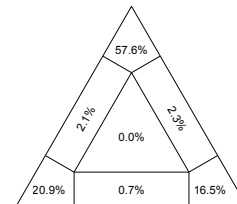

(Meto,Metopiinae)-(CamOphAno,Ctenopelmatinae)

(Meto,Ctenopelmatinae)-(CamOphAno,Metopiinae)

### Nesomesochorinae

(Ophioninae,Campopleginae)-(Nesomesochorinae,Anomaloniae)

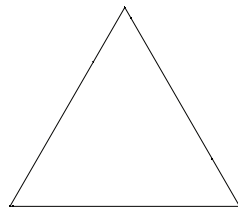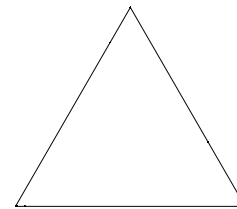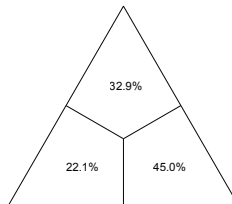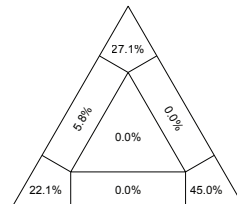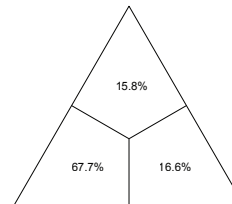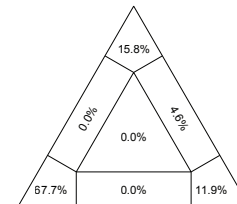

(Ophioninae,Anomaloniae)-(Campopleginae,Nesomesochorinae)

(Ophioninae,Nesomesochorinae)-(Campopleginae,Anomaloniae)

### Xoridiformes

(Ophioniformes,Pimplchneumoniformes)-(Brachycyrtiformes,Xoridiformes)

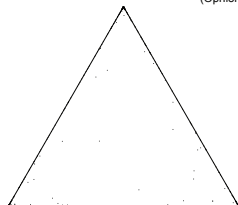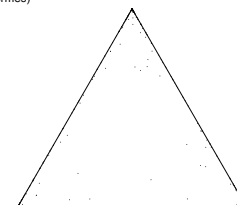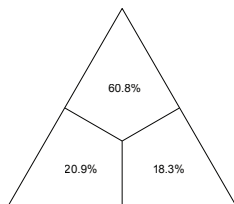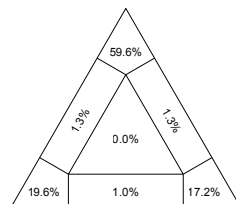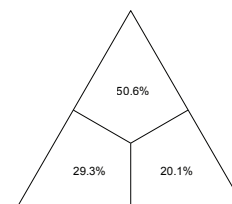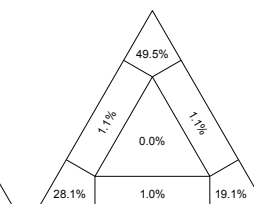

(Ophioniformes,Xoridiformes)-(Pimplchneumoniformes,Brachycyrtiformes)

(Ophioniformes,Brachycyrtiformes)-(Pimplchneumoniformes,Xoridiformes)

continued

## AA matrix

## NU matrix

### Lycorininae and Cremastinae

(Lycorininae and Cremastinae,MetoCamOphAno)-(Brachycyrtiformes,Xoridiformes)

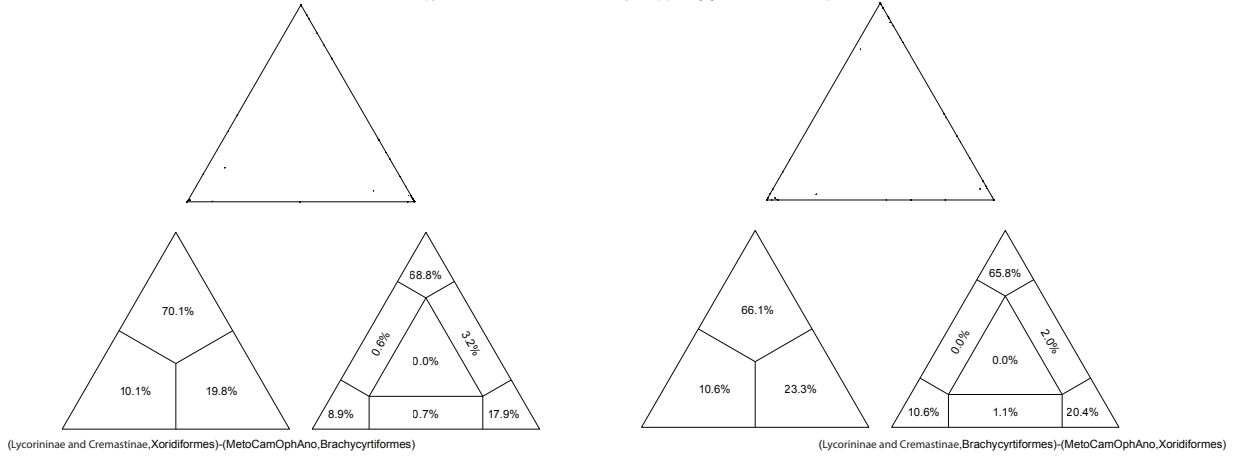

### Lycorininae and Cremastinae

(Lycorininae and Cremastinae,Meto)-(Brachycyrtiformes,Xoridiformes)

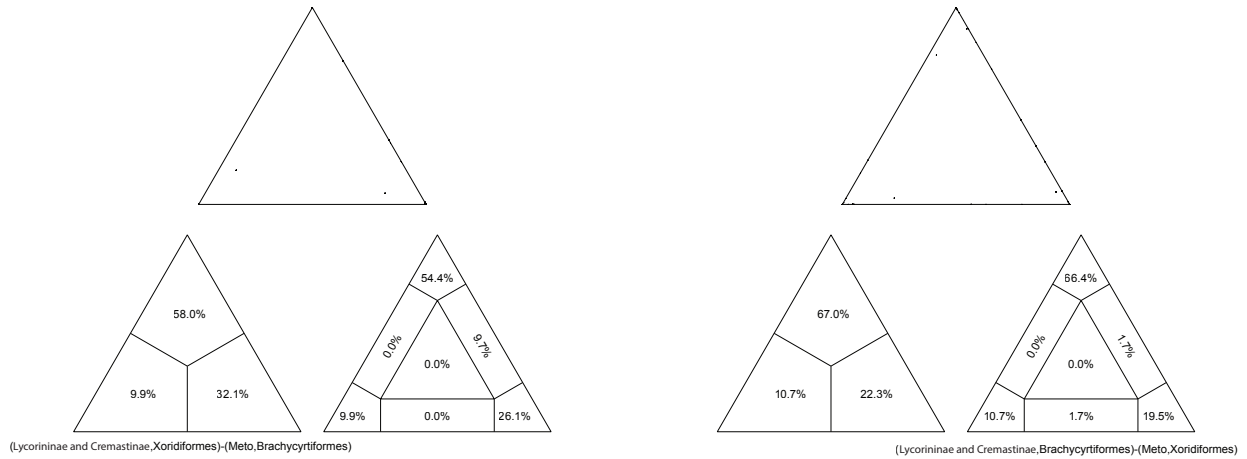

### Lycorininae and Cremastinae

(Lycorininae and Cremastinae,Meto)-(Brachycyrtiformes,Xoridiformes)

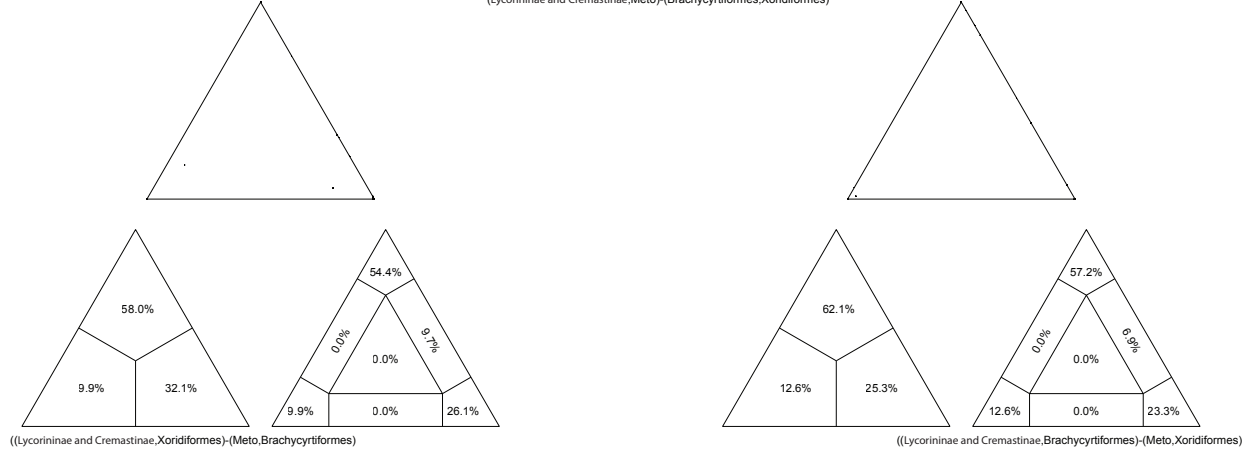

**Figure S9** Results from likelihood mapping. The analysis was based on both AA and NU matrixes.

For per analysis of conflict nodes, the conflict nodes in tests are at the top right corners of rectangles, eg. the first test is for testing the placement of Diplazontinae. Distribution of quartets depicted by dots on the likelihood mapping plot (On the top). The three areas show support for one of the different groupings (On the left). The quartets falling into the three corners are informative (On the right). The support values were drawn at corresponding regions, which indicate three hypotheses for the relationship of four groups. The details for different groups was in Supplementary files. Groups abbreviation: OtherPimpliformes: Pimpliformes exclude Acaenitinae and Diplazontinae; AteleMicro: *Ateleute* sp. and *Microleptes* sp.; CamOphAno: 4 subfamilies include Anomaloninae, Nesomesochorinae, Campopleginae and Ophioninae; Meto: *Triclistus* sp. and *Colpotrochia* sp.; Ophioniformes: this high-level grouping here not include Lycorininae and Cremastinae; MetoCamOphAno: 4 subfamilies include Anomaloninae, Nesomesochorinae, Campopleginae, Ophioninae and Meto (*Triclistus* sp. and *Colpotrochia* sp.).

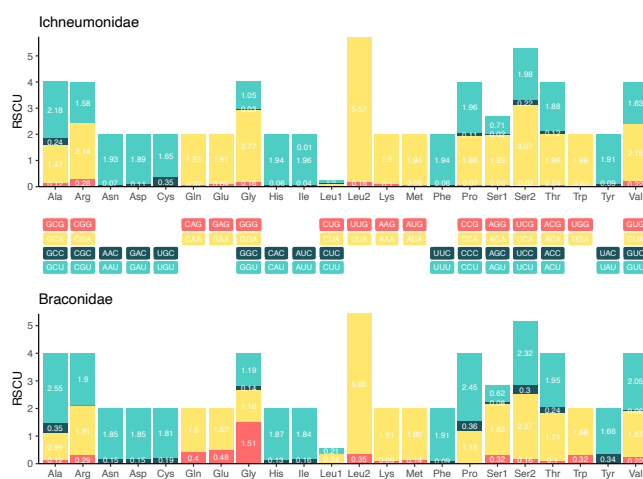

**Fig. S10** The mean for relative synonymous codon usage (RSCU) of 13 protein-coding genes in mitochondrial genomes of Ichneumonidae and Braconidae.

The terminal codon is excluded. Different colors represent the 3rd sites of G (red), A (yellow), C (atrovirens) and U (blue).

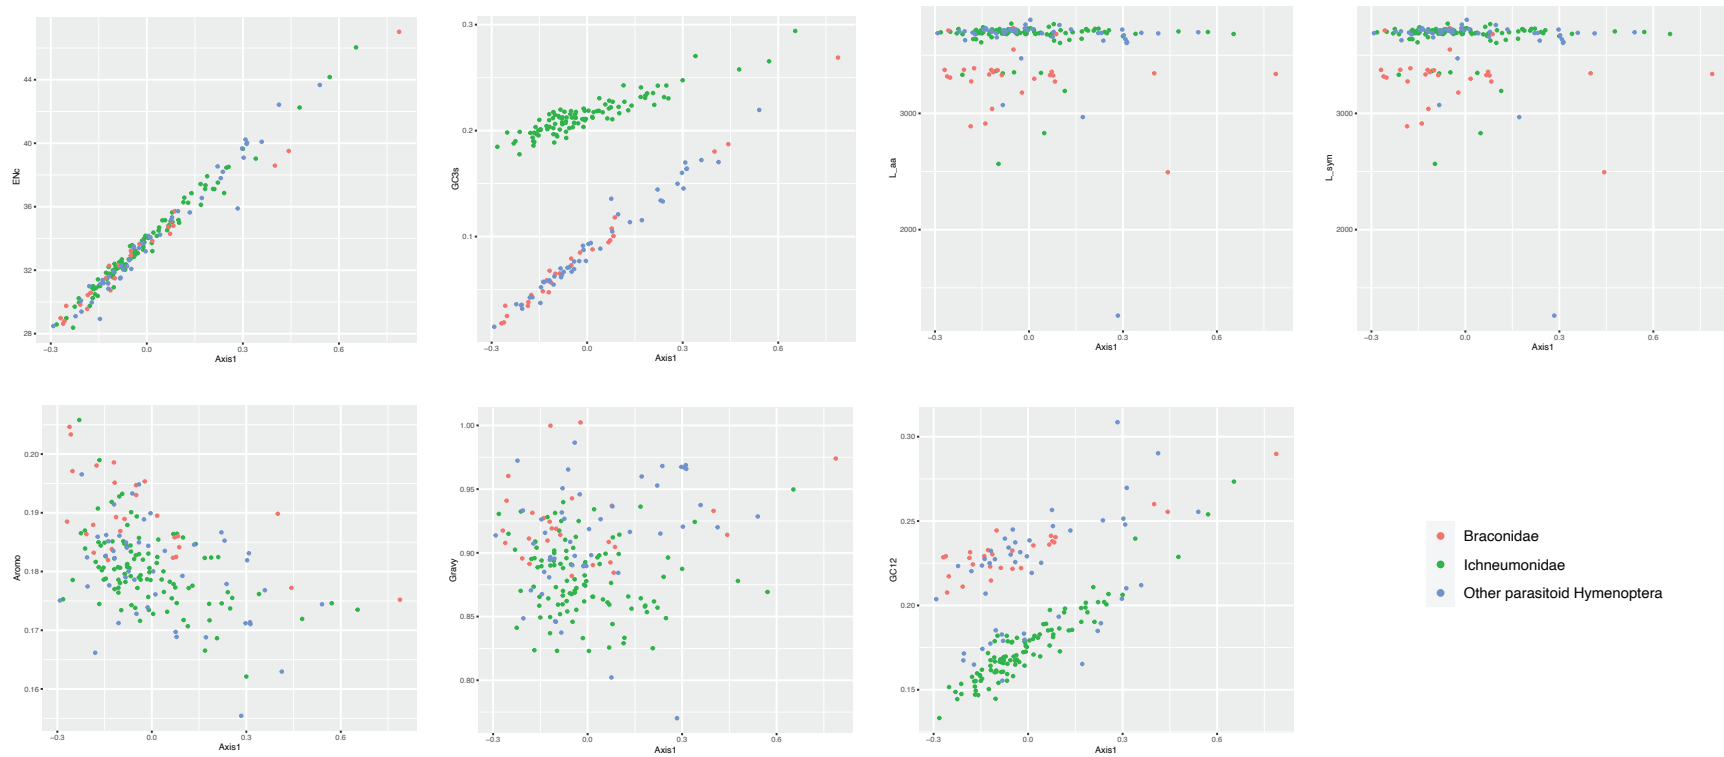

**Figure S11** The Correlation test for the factors that influence RSCU bias against the first major axis (Axis1/48.93% explanation of the variation) generated by Correspondence Analysis (COA) in Ichneumonidae, Braconidae and other parasitoid Hymenoptera.

The factors include ENc (effective number of codons), GC3s (the G + C content at the 3rd codon positions, GC12 (the mean for the of G + C content at the 1st and 2nd codon positions); Aromo (general average aromaticity); GRAVY (general average hydropathicity); L\_syn (length of synonymous codons); L\_aa (length of amino acids).

## Supplementary Reference

1. Tang, P.; Zhu, J.C.; Zheng, B.Y.; Wei, S.J.; Sharkey, M.; Chen, X.X.; Vogler, A.P. Mitochondrial phylogenomics of the Hymenoptera. *Mol. Phylogenet. Evol.* **2019**, *131*, 8–18, doi:10.1016/j.ympev.2018.10.040.
2. Wei, S.; Shi, M.; Sharkey, M.J.; Achterberg, C. van; Chen, X. Comparative mitogenomics of Braconidae (Insecta : Hymenoptera) and the phylogenetic utility of mitochondrial genomes with special reference to Holometabolous insects. *BMC Genomics* **2010**, *11*, 1471–2164, doi:10.1186/1471-2164-11-371.
3. Wei, S.; Shi, M.; He, J.; Sharkey, M.; Chen, X. The complete mitochondrial genome of *Diadegma semiclausum* ( Hymenoptera : Ichneumonidae ) indicates extensive independent evolutionary events. *Genome* **2009**, *52*, 308–319, doi:10.1139/G09-008.
4. Li, Q.; Wei, S.; Shi, M.; Chen, X.; Li, Q.; Wei, S.; Shi, M.; Chen, X. The mitochondrial genome of *Diadromus collaris* ( Hymenoptera: Ichneumonidae). *Mitochondrial DNA* **2015**, *26*, 303–304, doi:10.3109/19401736.2013.825786.
5. Dowton, M.; Cameron, S.L.; Austin, A.D.; Whiting, M.F. Phylogenetic approaches for the analysis of mitochondrial genome sequence data in the Hymenoptera - A lineage with both rapidly and slowly evolving mitochondrial genomes. *Mol. Phylogenet. Evol.* **2009**, *52*, 512–519, doi:10.1016/j.ympev.2009.04.001.
6. Mao, M.; Gibson, T.; Dowton, M. Evolutionary dynamics of the mitochondrial genome in the Evaniomorpha (Hymenoptera)-A group with an intermediate rate of gene rearrangement. *Genome Biol. Evol.* **2014**, *6*, 1862–1874, doi:10.1093/gbe/evu145.
7. Wei, S.J.; Wu, Q.L.; Van Achterberg, K.; Chen, X.X. Rearrangement of the nad1 gene in *Pristaulacus compressus* (Spinola) (Hymenoptera: Evanioidea: Aulacidae) mitochondrial genome. *Mitochondrial DNA* **2013**, *26*, 629–630, doi:10.3109/19401736.2013.834436.
8. Wu, Q.L.; Li, Q.; Gu, Y.; Shi, B.C.; van Achterberg, C.; Wei, S.J.; Chen, X.X. The complete mitochondrial genome of *Taeniogonalos taihorina* (Bischoff) (Hymenoptera: Trigonalysidae) reveals a novel gene rearrangement pattern in the Hymenoptera. *Gene* **2014**, *543*, 76–84, doi:10.1016/j.gene.2014.04.003.
9. Mao, M.; Dowton, M. Complete mitochondrial genomes of *Ceratobaeus* sp. and *Idris* sp. (Hymenoptera: Scelionidae): shared gene rearrangements as potential phylogenetic



- markers at the tribal level. *Mol. Biol. Rep.* **2014**, *41*, 6419–6427, doi:10.1007/s11033-014-3522-x.
10. Mao, M.; Austin, A.D.; Johnson, N.F.; Dowton, M. Coexistence of minicircular and a highly rearranged mtDNA molecule suggests that recombination shapes mitochondrial genome organization. *Mol. Biol. Evol.* **2014**, *31*, 636–644, doi:10.1093/molbev/mst255.
  11. Wei, S.J.; Tang, P.; Zheng, L.H.; Shi, M.; Chen, X.X. The complete mitochondrial genome of *Evania appendigaster* (Hymenoptera: Evaniidae) has low A+T content and a long intergenic spacer between *atp8* and *atp6*. *Mol. Biol. Rep.* **2010**, *37*, 1931–1942, doi:10.1007/s11033-009-9640-1.
  12. Mao, M.; Gibson, T.; Dowton, M. Higher-level phylogeny of the Hymenoptera inferred from mitochondrial genomes. *Mol. Phylogenet. Evol.* **2015**, *84*, 34–43, doi:10.1016/j.ympev.2014.12.009.
  13. Oliveira, D.S.; Gomes, T.M.F.F.; Loreto, E.L.S. The rearranged mitochondrial genome of *Leptopilina boulardi* (Hymenoptera: Figitidae), a parasitoid wasp of *Drosophila*. *Genet. Mol. Biol.* **2016**, *39*, 611–615, doi:10.1590/1678-4685-GMB-2016-0062.
  14. Xiao, J.H.; Jia, J.G.; Murphy, R.W.; Huang, D.W. Rapid evolution of the mitochondrial genome in chalcidoid wasps (hymenoptera: Chalcidoidea) driven by parasitic lifestyles. *PLoS One* **2011**, *6*, doi:10.1371/journal.pone.0026645.
  15. Dowton, M.; Cameron, S.L.; Dowavic, J.I.; Austin, A.D.; Whiting, M.F. Characterization of 67 mitochondrial tRNA gene rearrangements in the Hymenoptera suggests that mitochondrial tRNA gene position is selectively neutral. *Mol. Biol. Evol.* **2009**, *26*, 1607–1617, doi:10.1093/molbev/msp072.
  16. Mao, M.; Valerio, A.; Austin, A.D.; Dowton, M.; Johnson, N.F. The first mitochondrial genome for the wasp superfamily Platygastroidea: The egg parasitoid *Trissolcus basal*. *Genome* **2012**, *55*, 194–204, doi:10.1139/g2012-005.
  17. Castro, L.R.; Ruberu, K.; Dowton, M. Mitochondrial genomes of *Vanhornia eucnemidarum* (Apocrita: Vahnornidae) and *Primeuchroea* spp. (Aculeata: Chrysididae): Evidence of rearranged mitochondrial genomes within the Apocrita (Insecta: Hymenoptera). *Genome* **2006**, *49*, 752–766, doi:10.1139/G06-030.
  18. Li, Q.; Wei, S.J.; Tang, P.; Wu, Q.; Shi, M.; Sharkey, M.J.; Chen, X.X. Multiple lines of evidence from mitochondrial genomes resolve phylogenetic relationships of parasitic

wasps in Braconidae. *Genome Biol. Evol.* **2016**, 8, 2651–2662, doi:10.1093/gbe/evw184.
